# Supplementary material for: Human RELA dominant-negative mutations underlie type I interferonopathy with autoinflammation and autoimmunity
Source: PubMed Central journal article supplement — J Exp Med. 2023 Jun 5;220(9):e20212276. doi: 10.1084/jem.20212276 (PMC10242411; doi:10.1084/jem.20212276), 2023-06-05

Figure 2A RELA

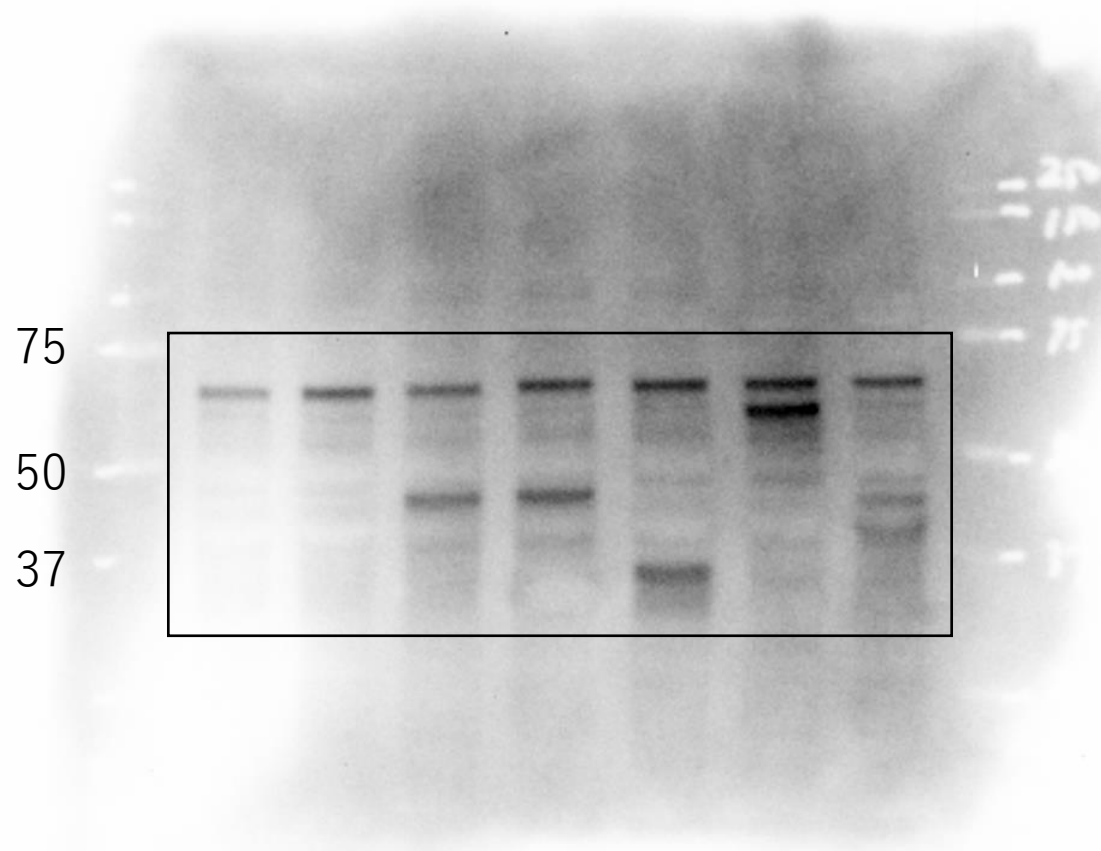

Figure 2A RELA

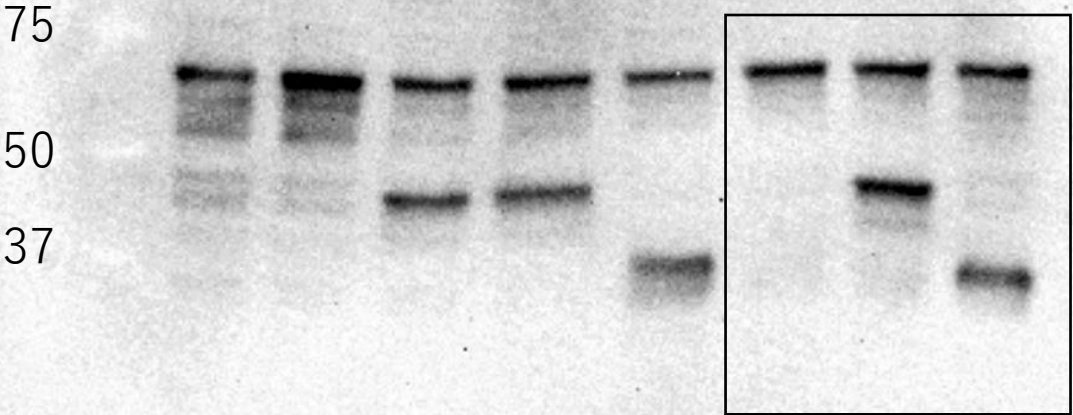

Figure 2A  $\beta$ -actin

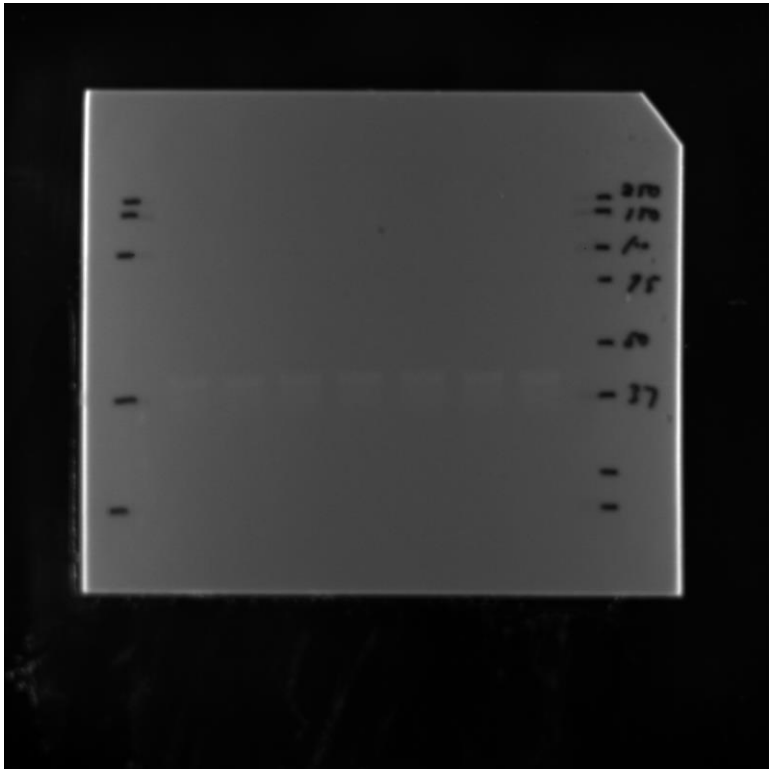

※Colorimetric

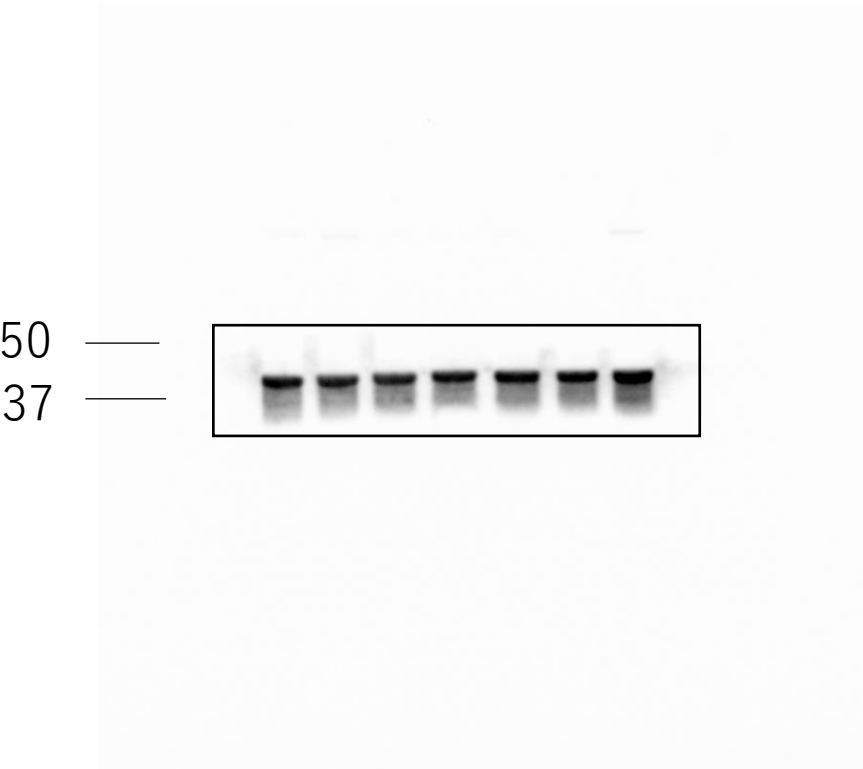

Figure 2A  $\beta$ -actin

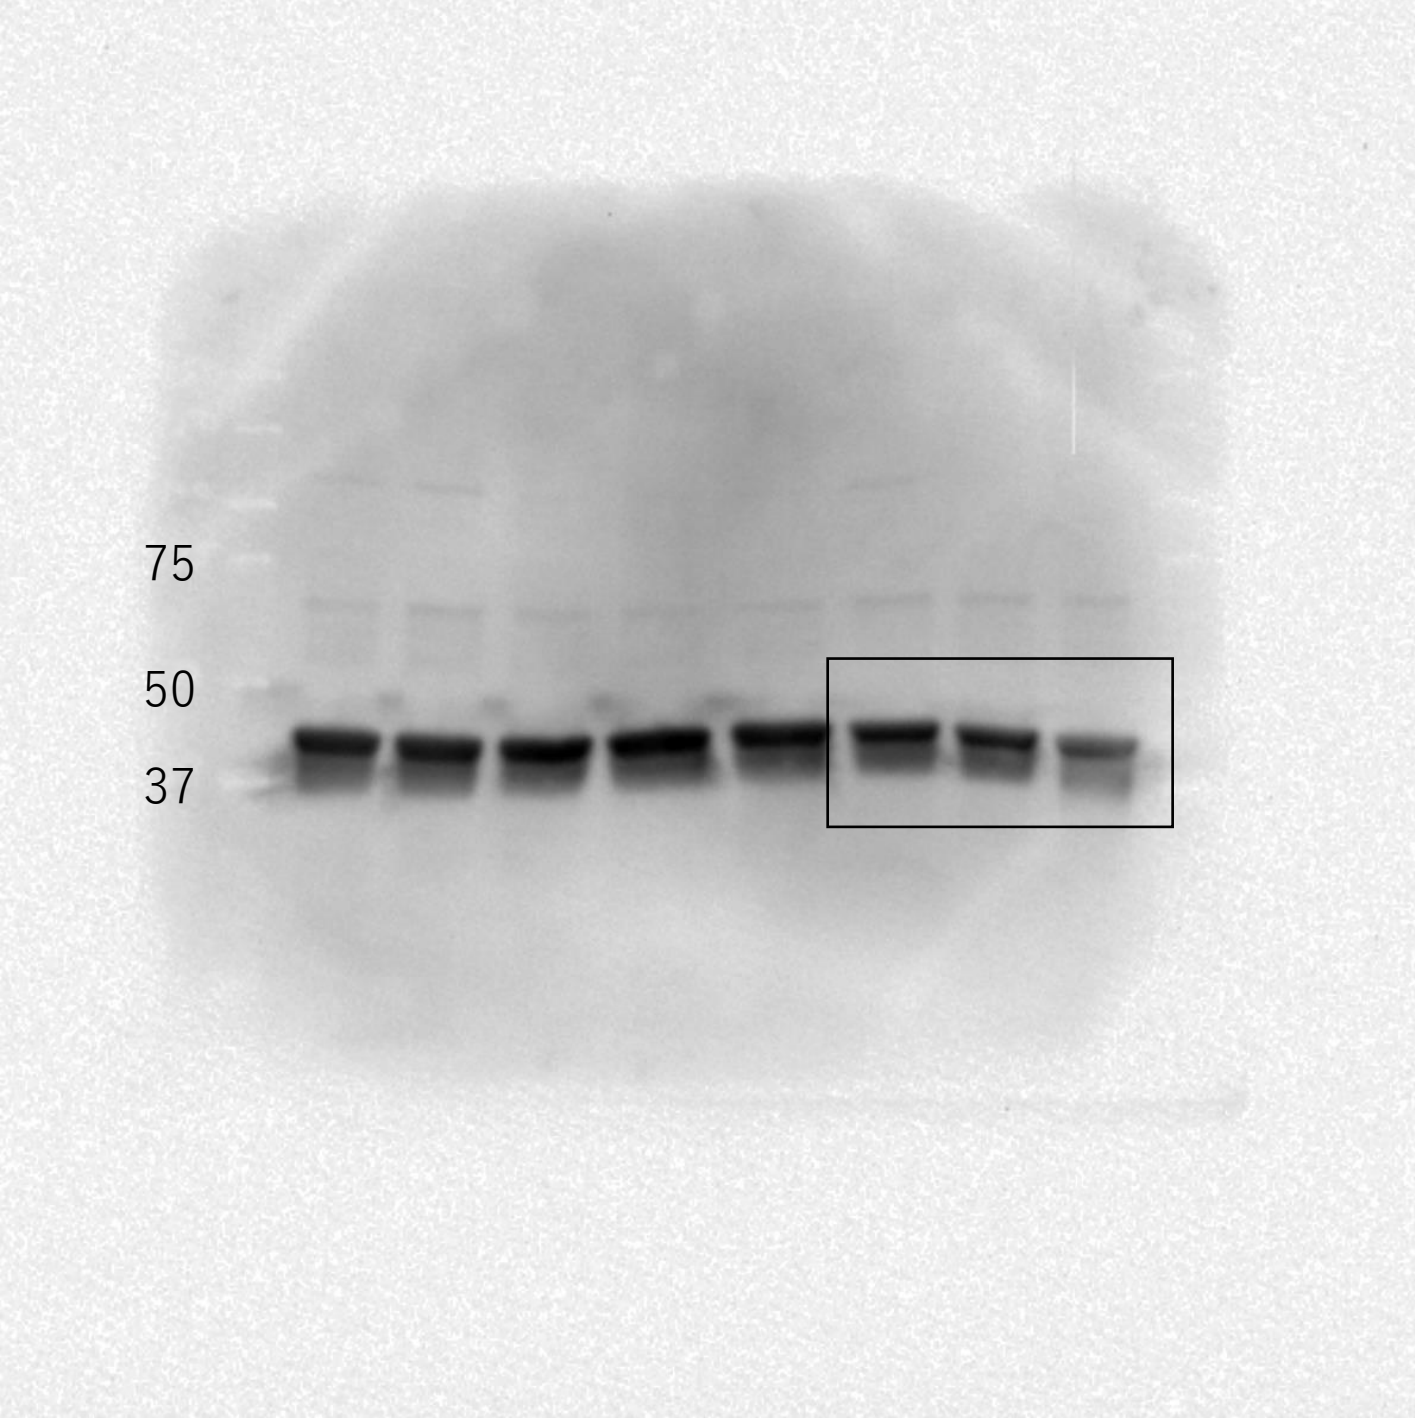

Figure 2B  
RELA

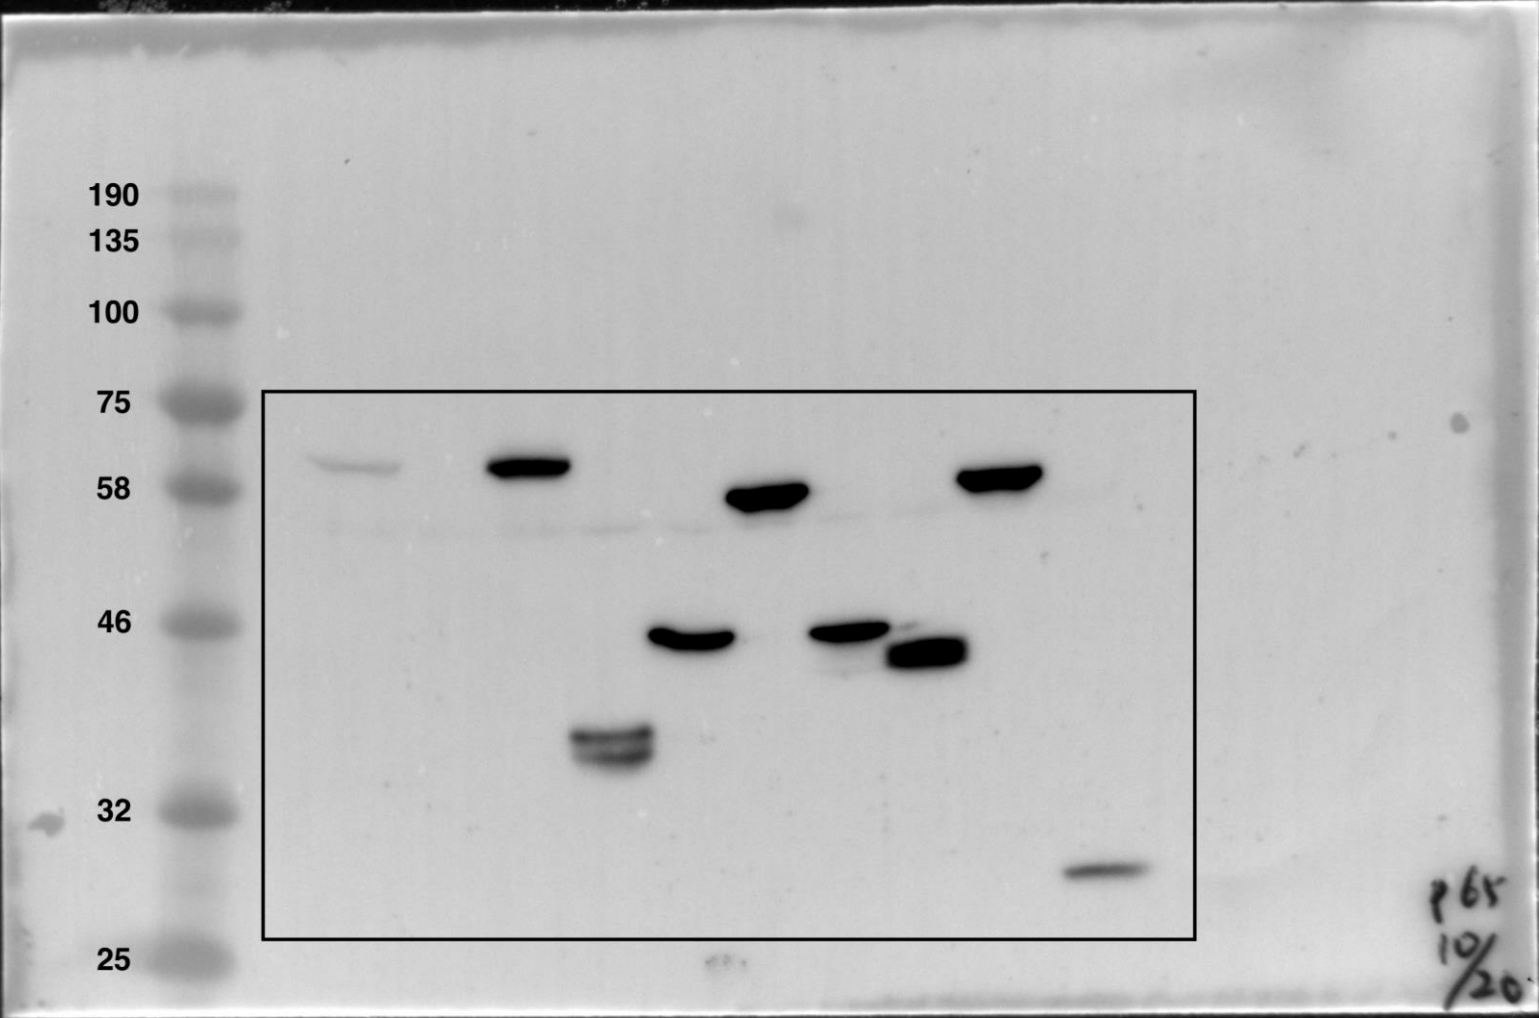

Figure 2B  
 $\beta$ -actin

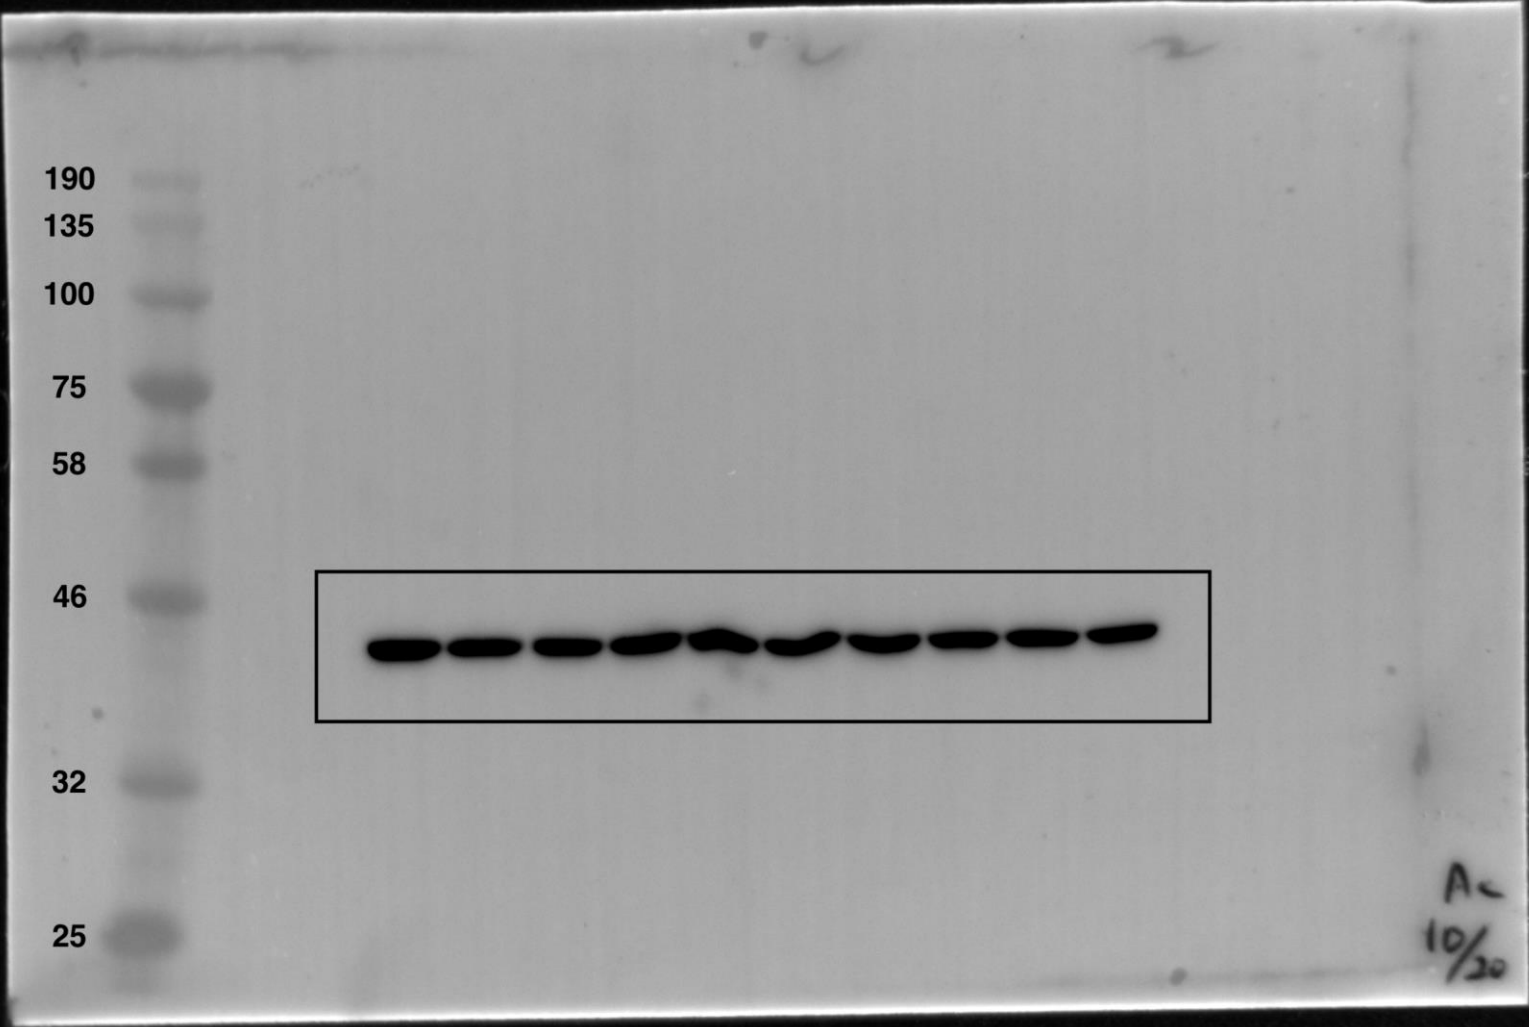

Figure 2B

Flag

Myc

$\beta$ -actin

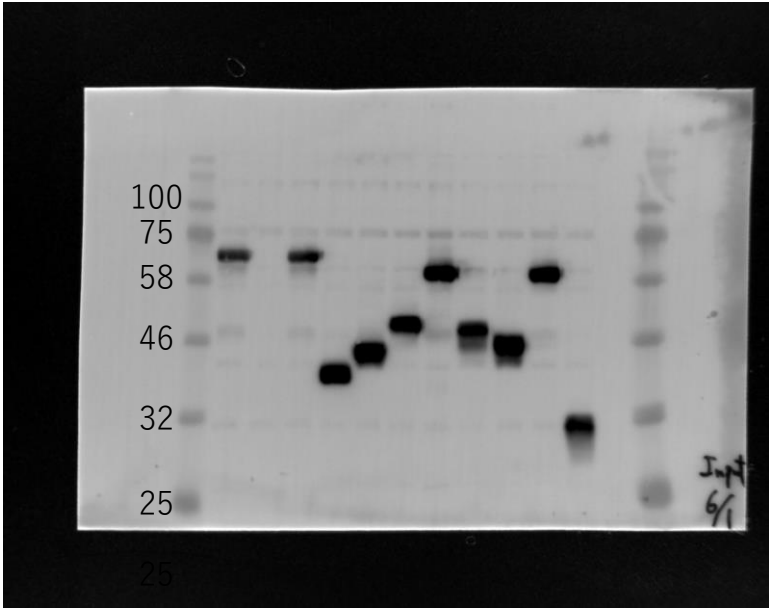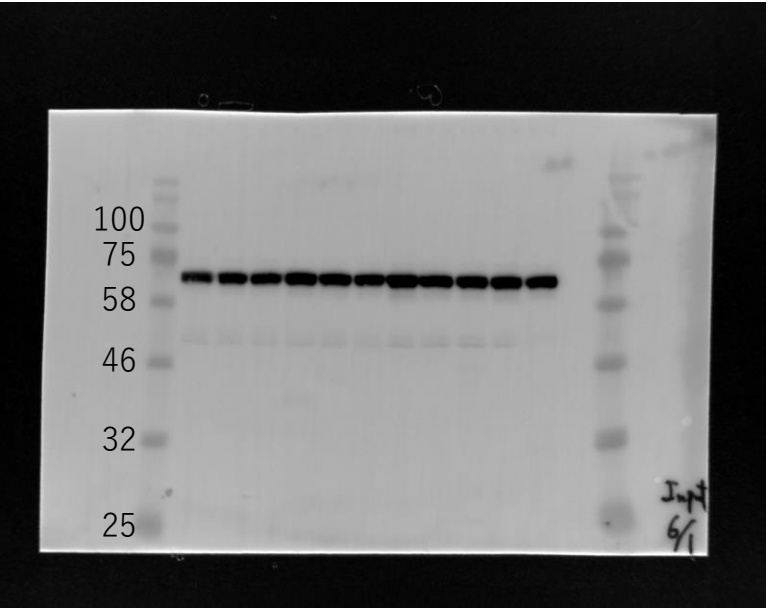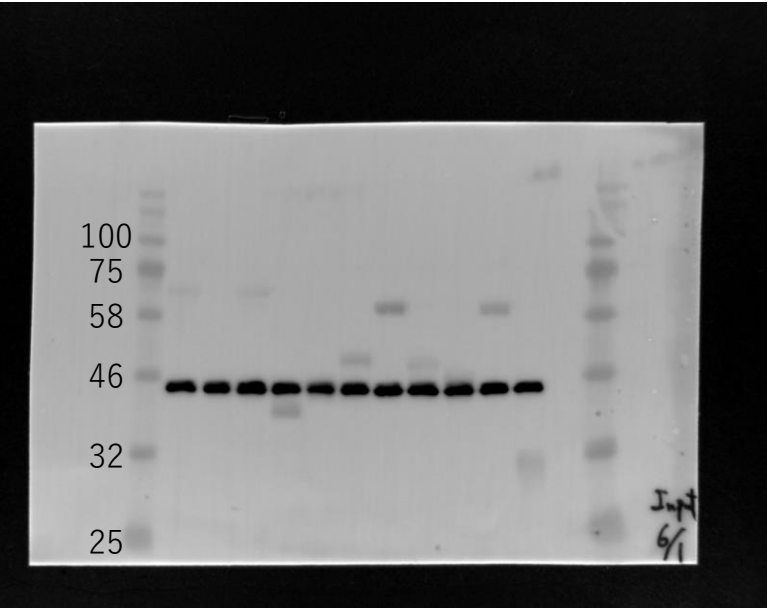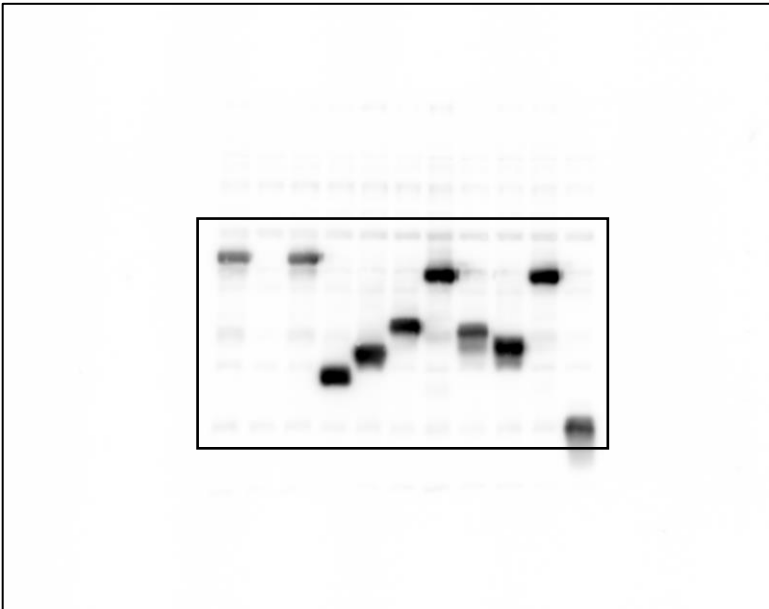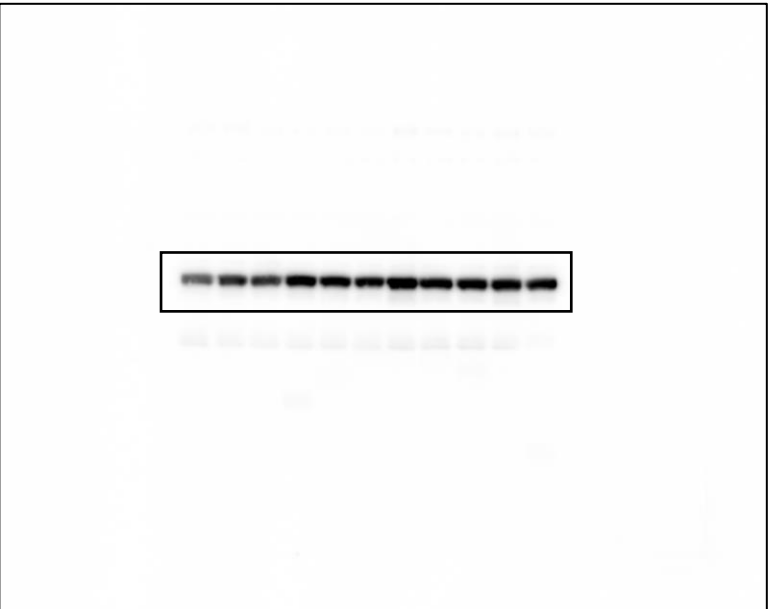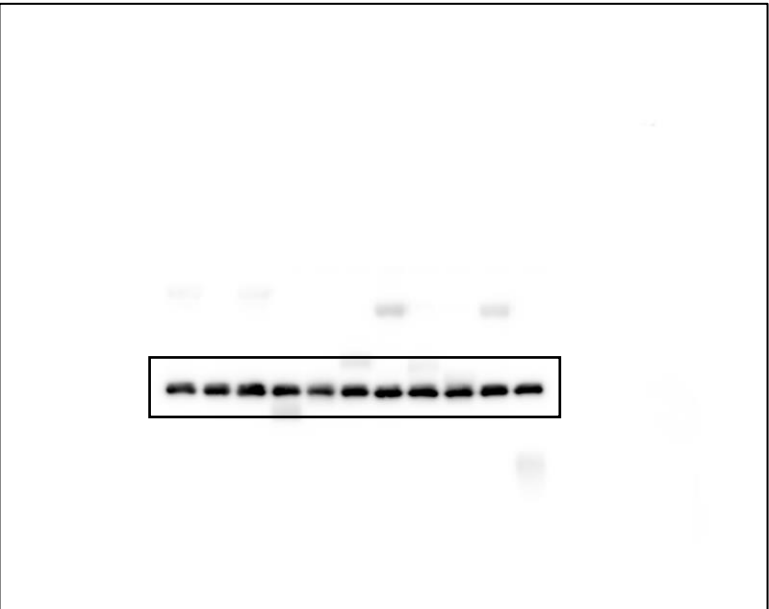

Figure 2C

Flag

Myc

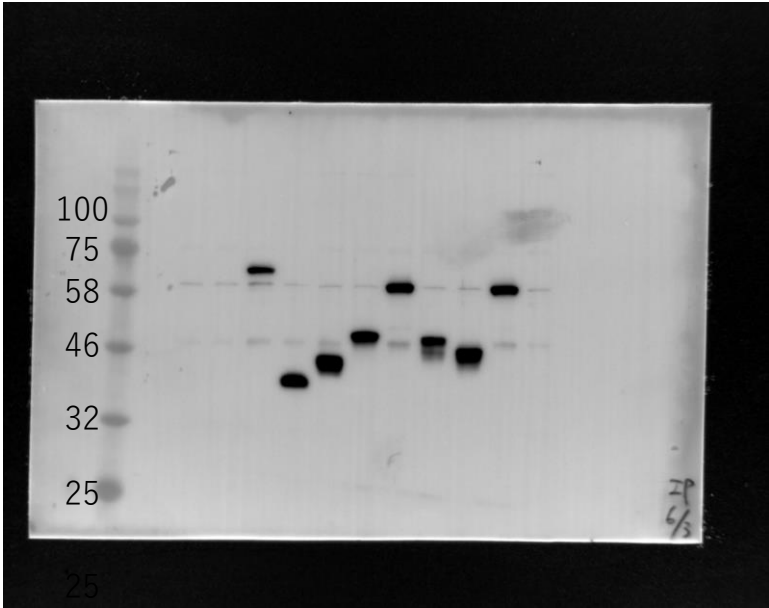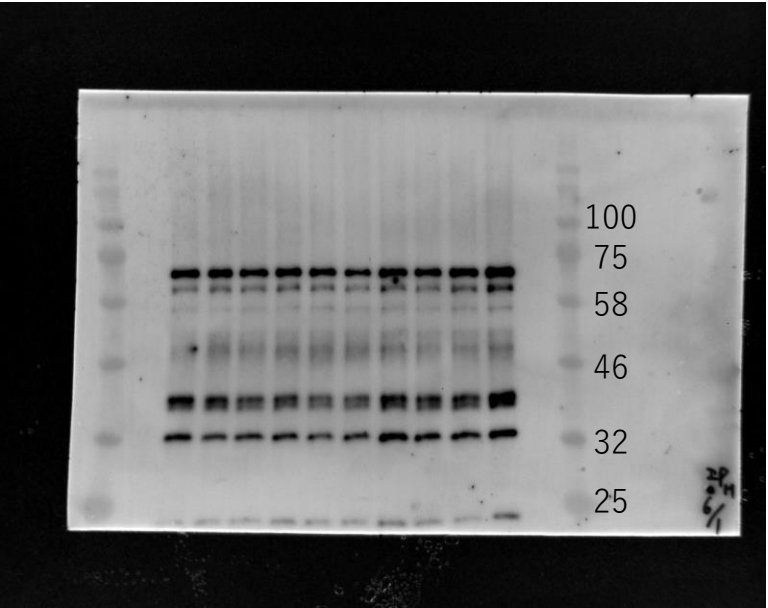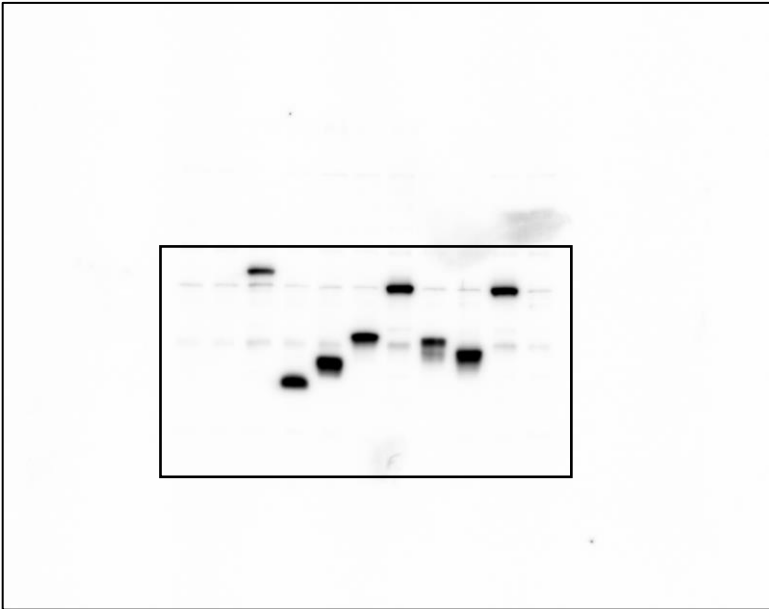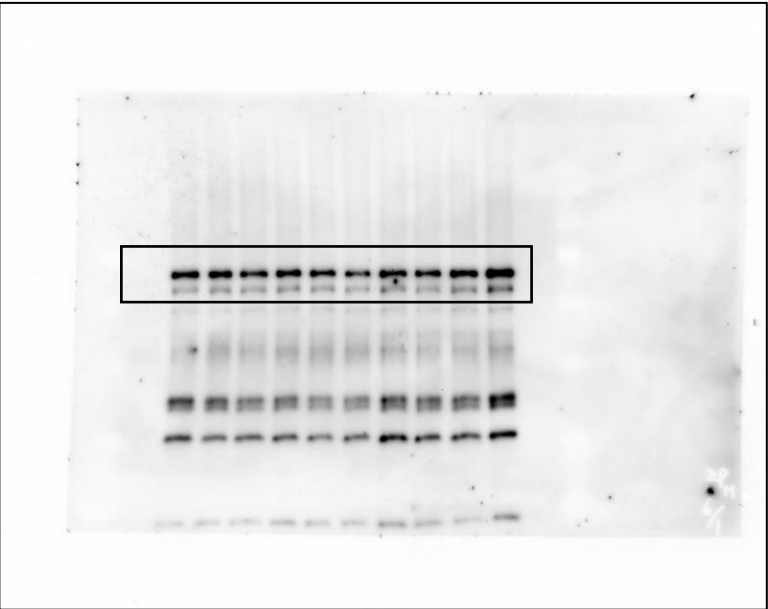

Supplement: JEM_20212276_SourceDataF2.pdf [file JEM_20212276_SourceDataF2.pdf]
