# Supplementary material for: Human RELA dominant-negative mutations underlie type I interferonopathy with autoinflammation and autoimmunity
Source: PubMed Central journal article supplement — J Exp Med. 2023 Jun 5;220(9):e20212276. doi: 10.1084/jem.20212276 (PMC10242411; doi:10.1084/jem.20212276), 2023-06-05

**Fig. S2C**

Flag

Myc

$\beta$ -actin

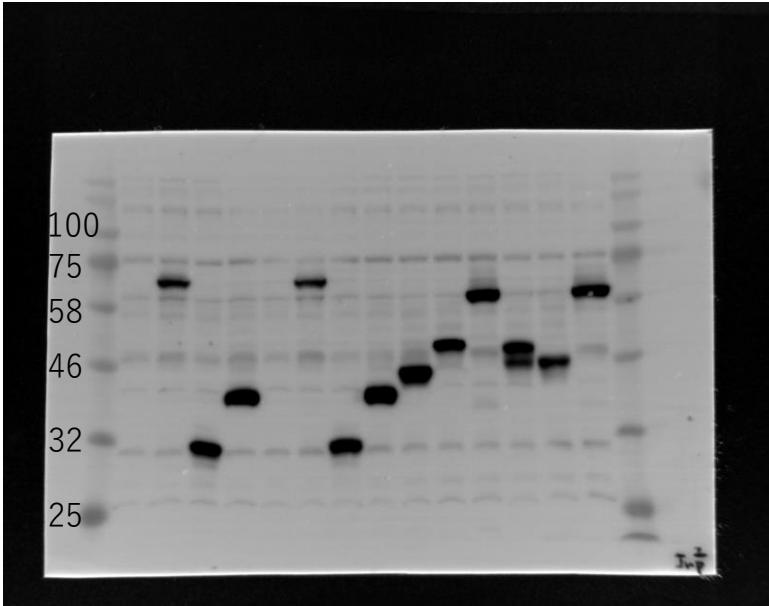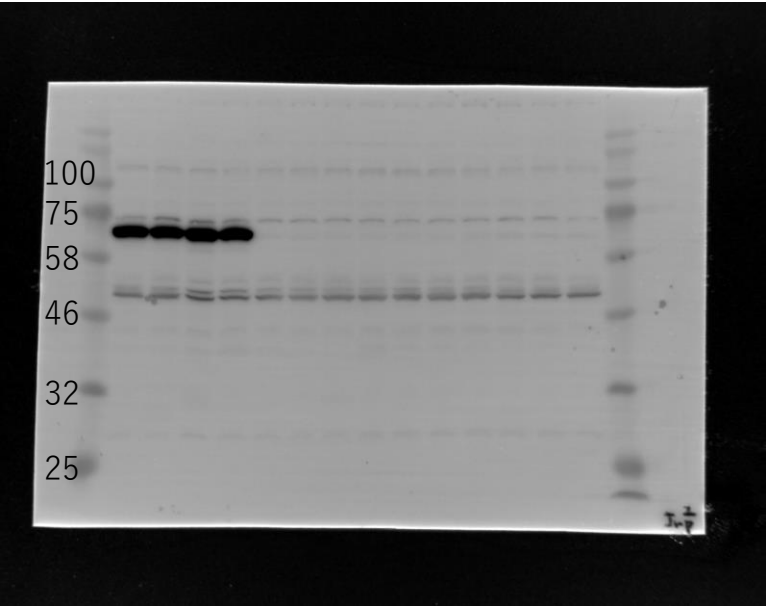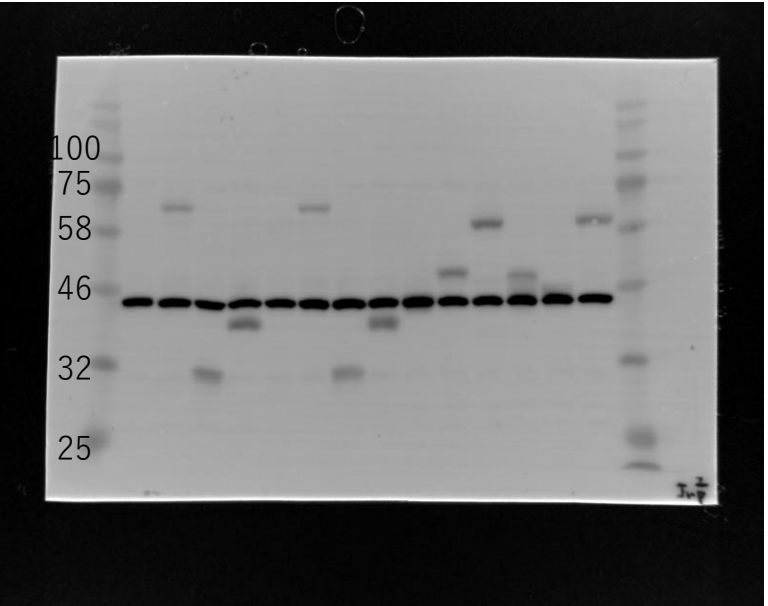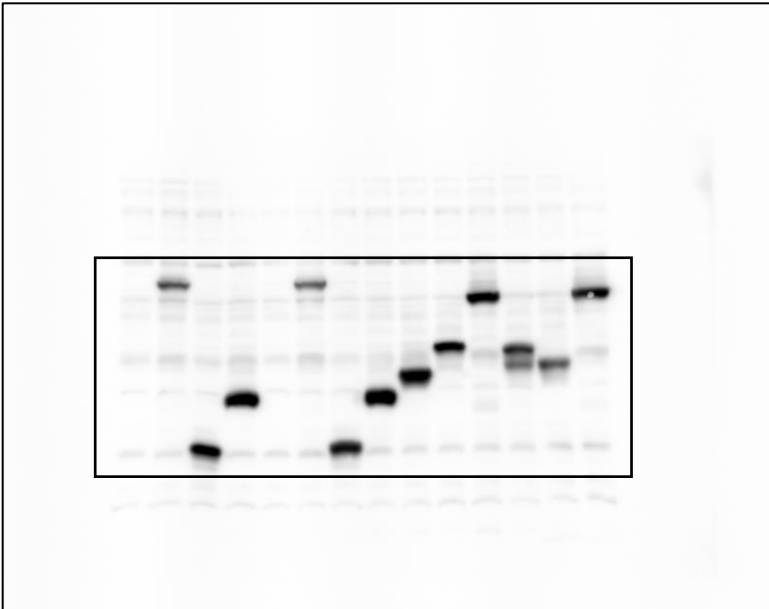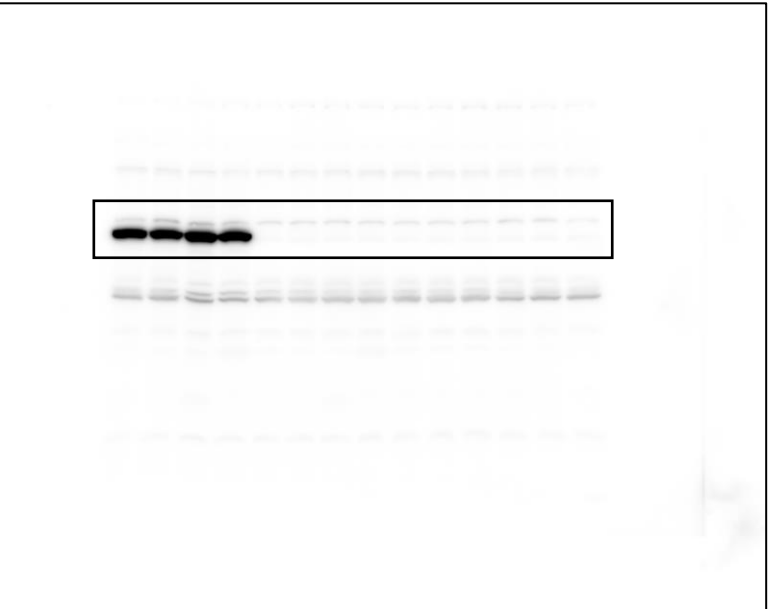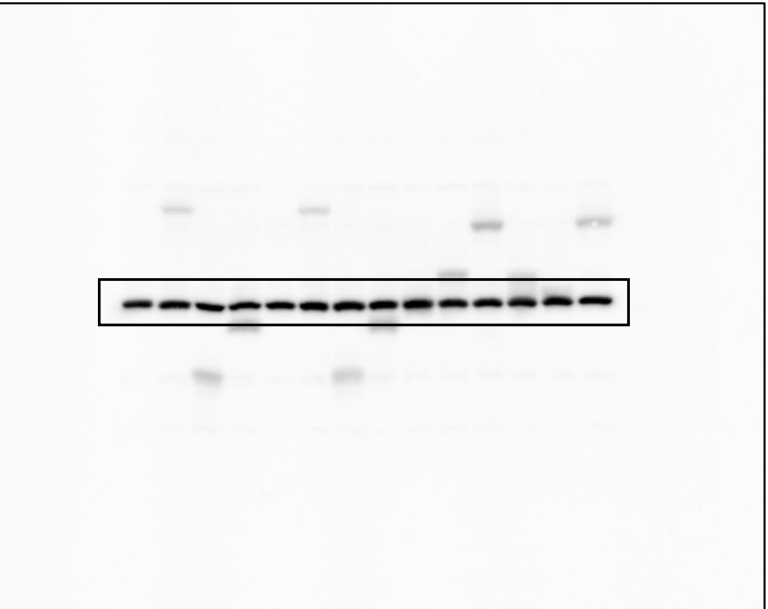

**Fig. S2D**

Flag

Myc

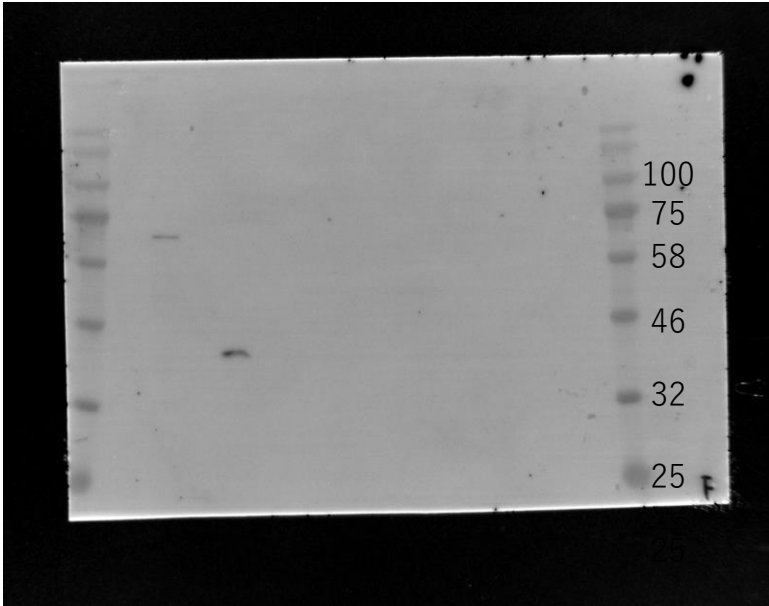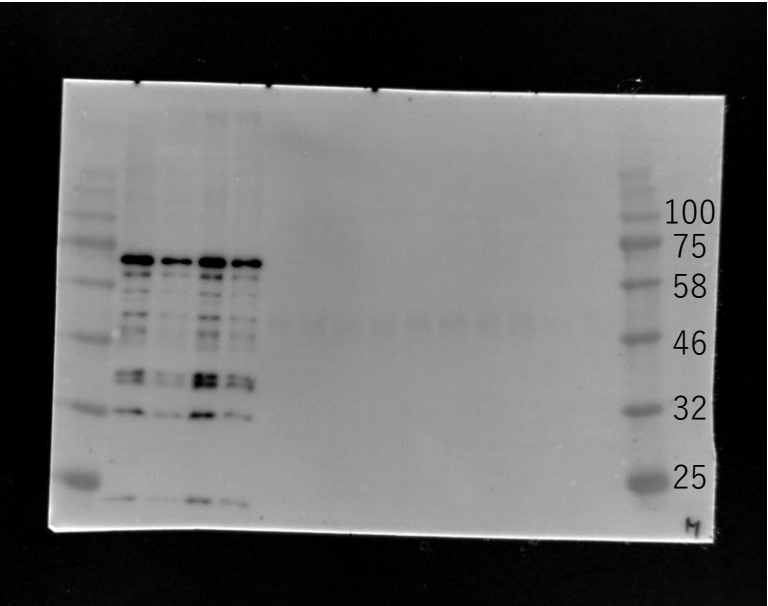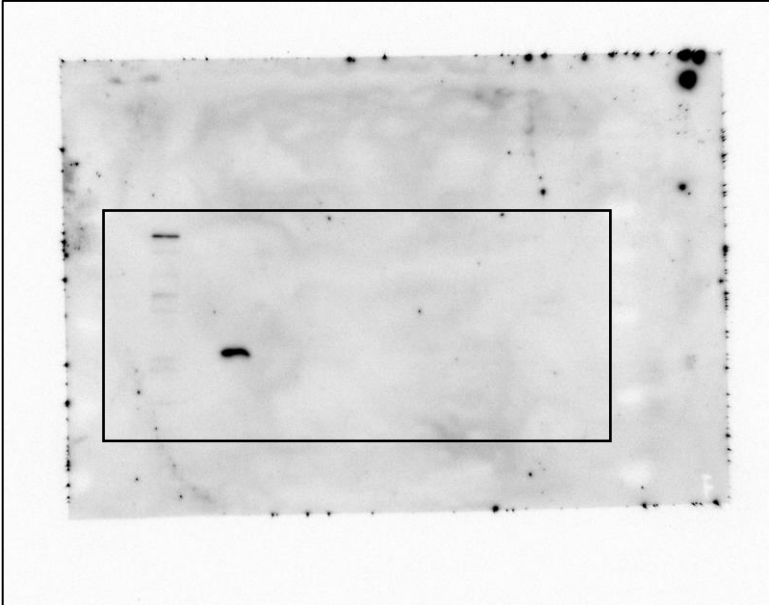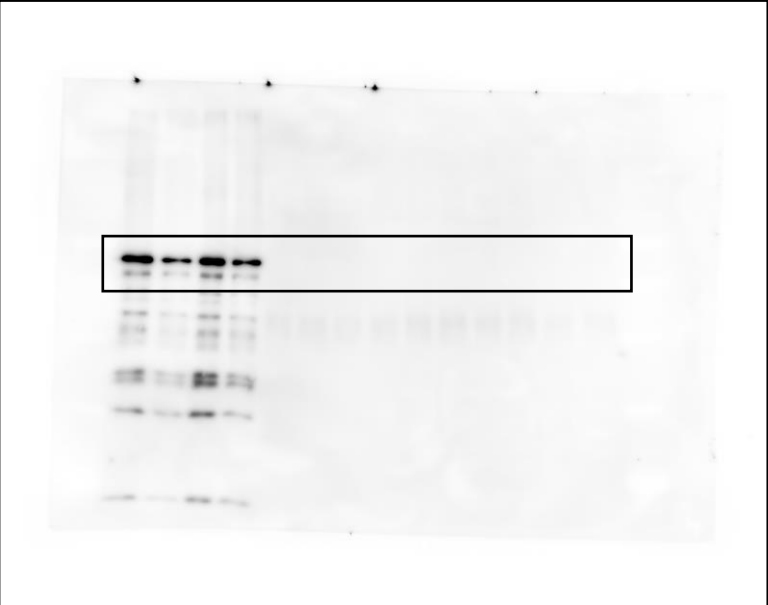

**Fig. S2E**

Flag

Myc

$\beta$ -actin

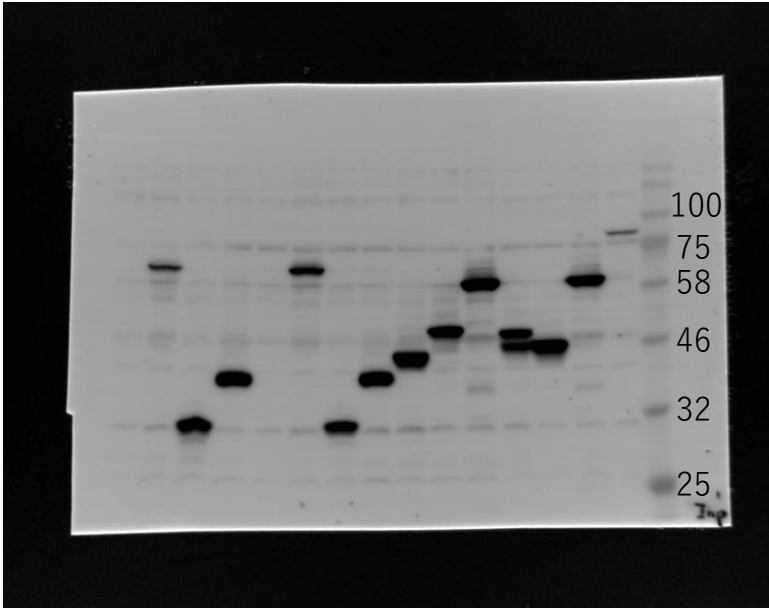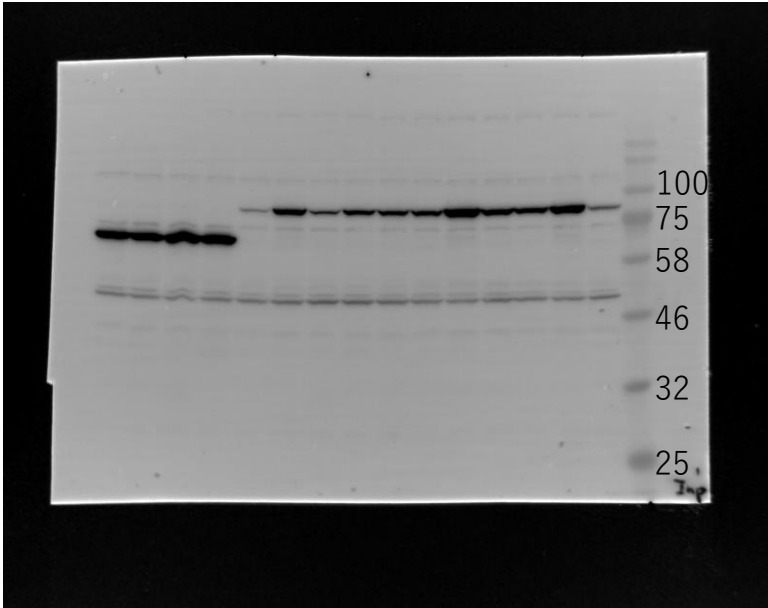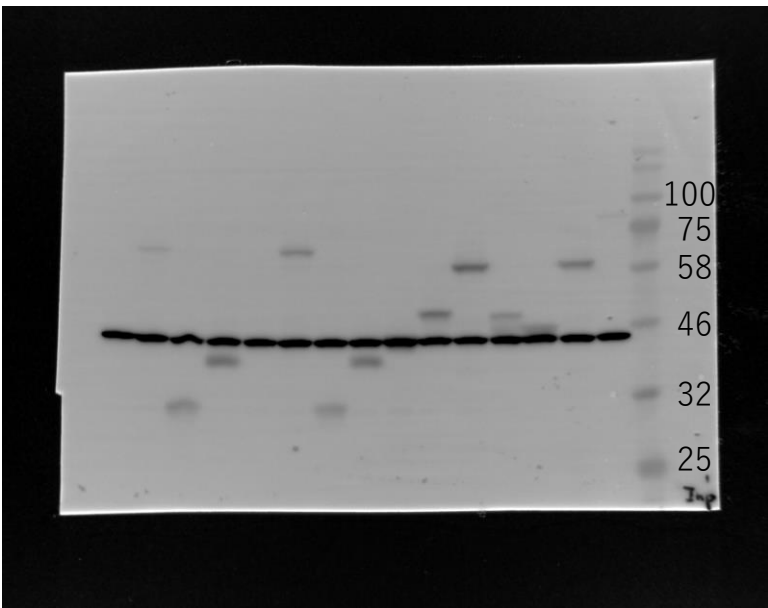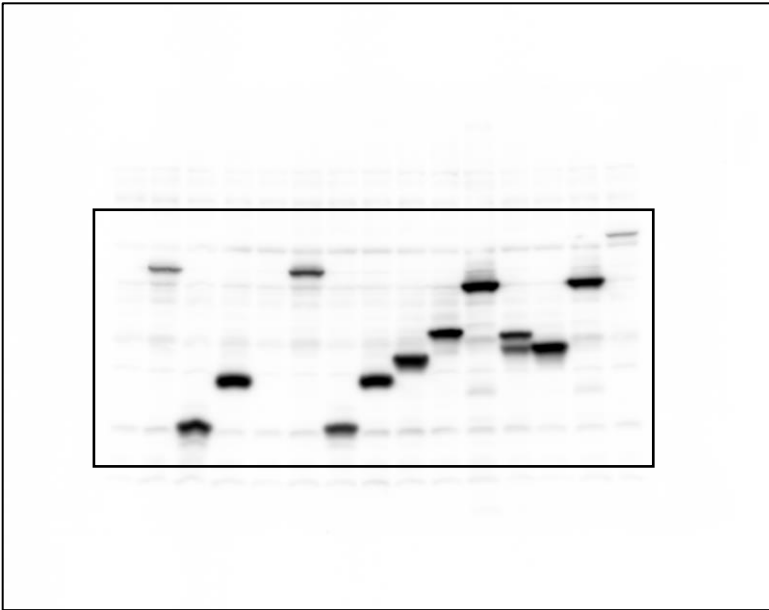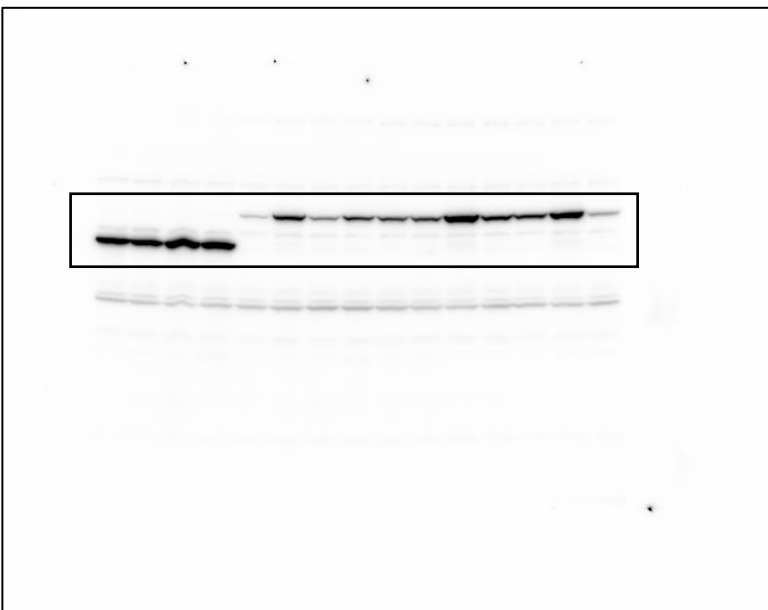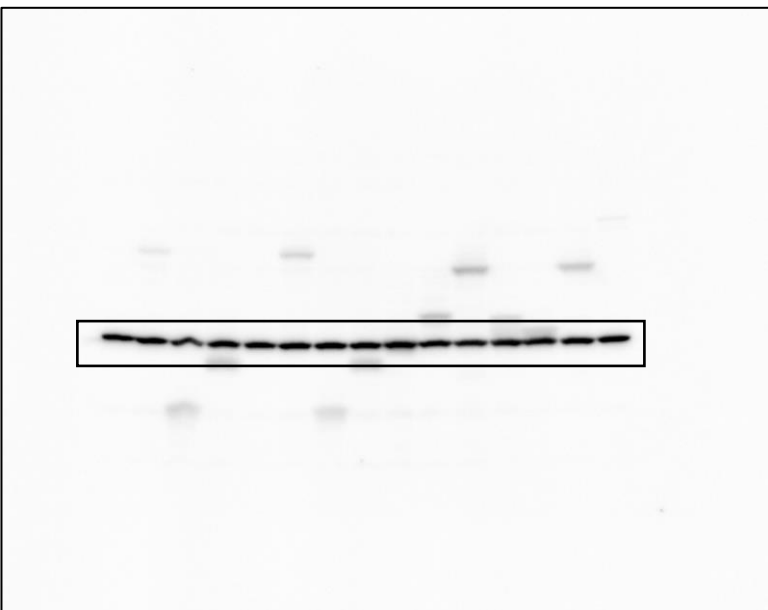

**Fig. S2F**

Flag

Myc

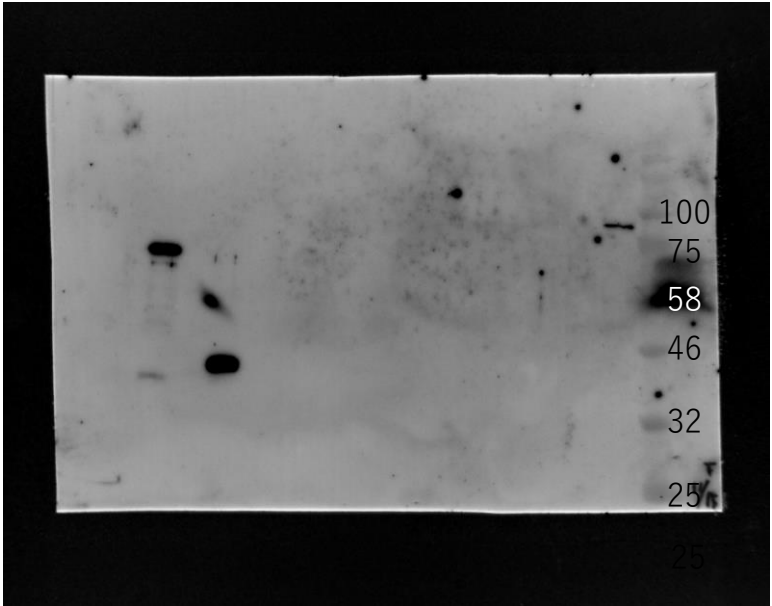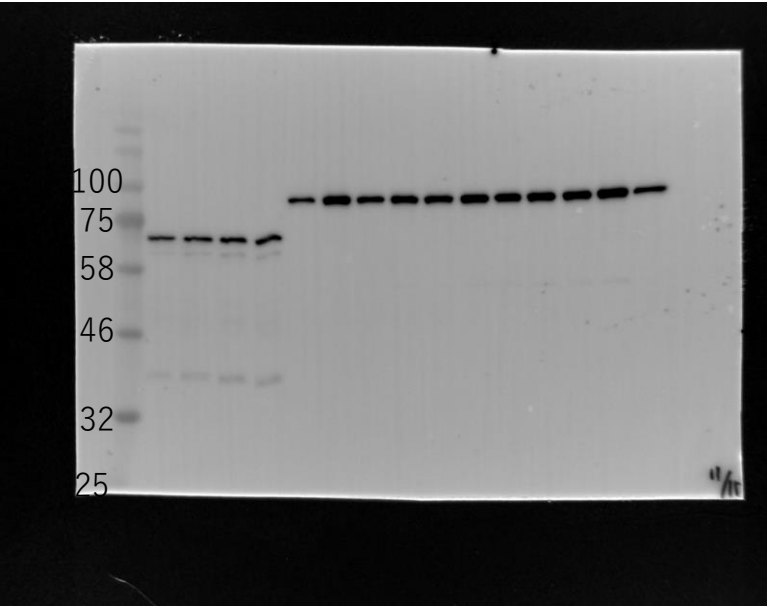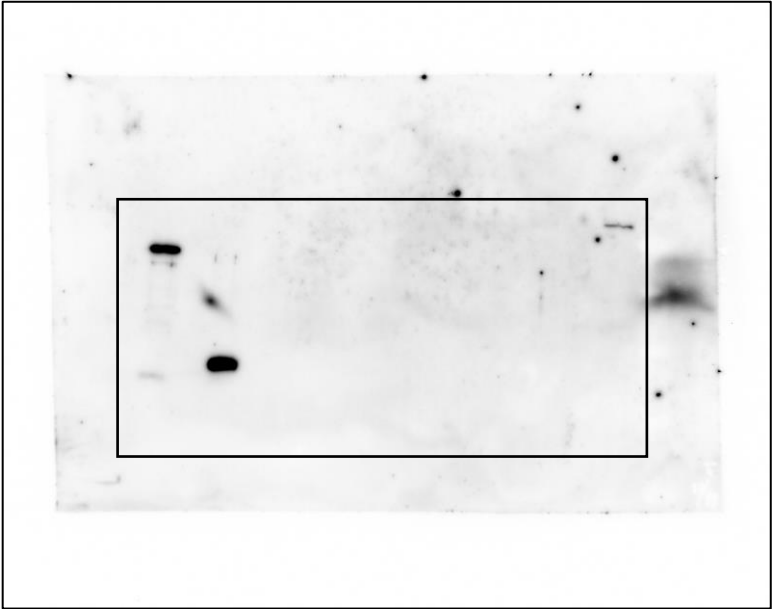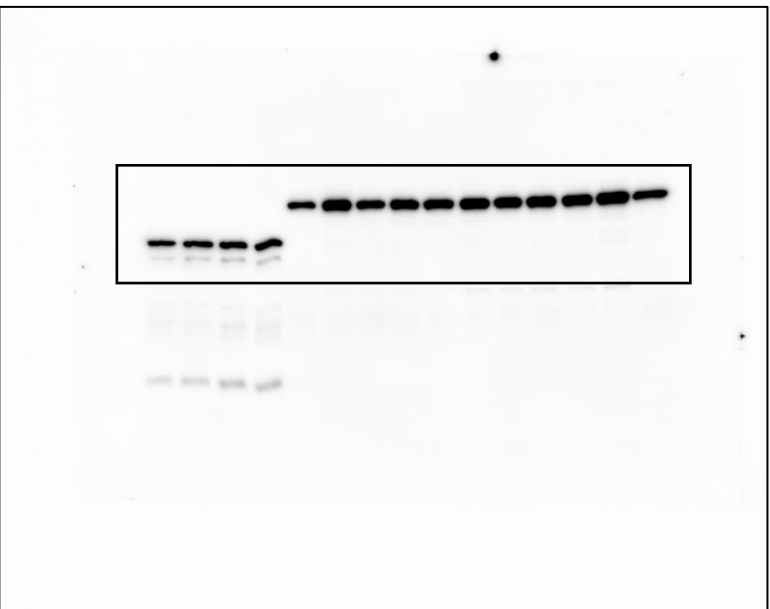

**Fig. S2G**

Flag

Myc

$\beta$ -actin

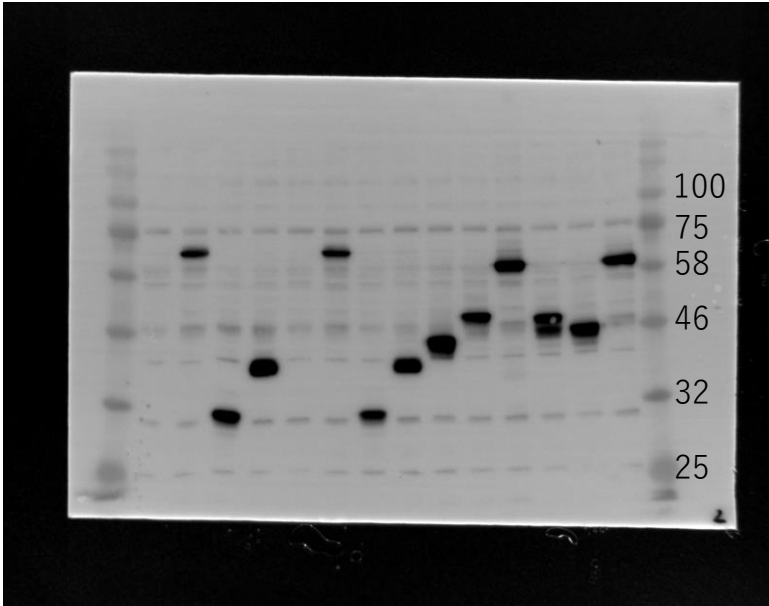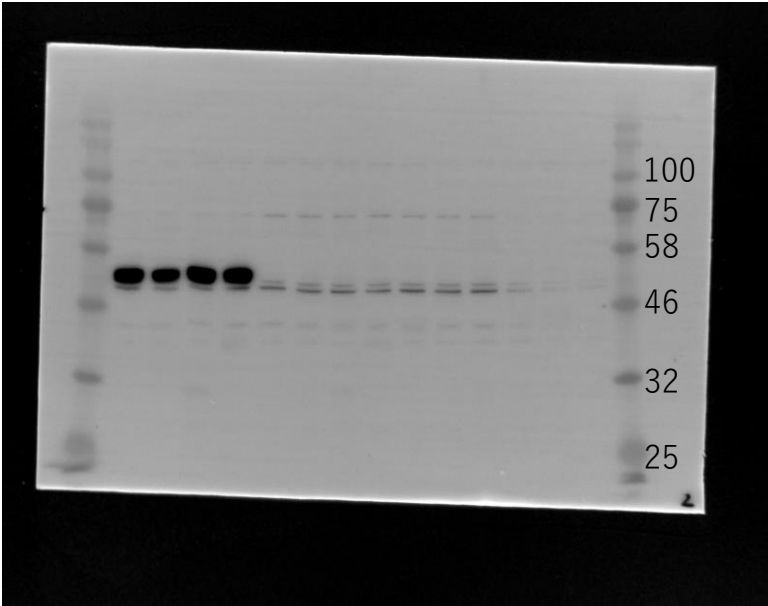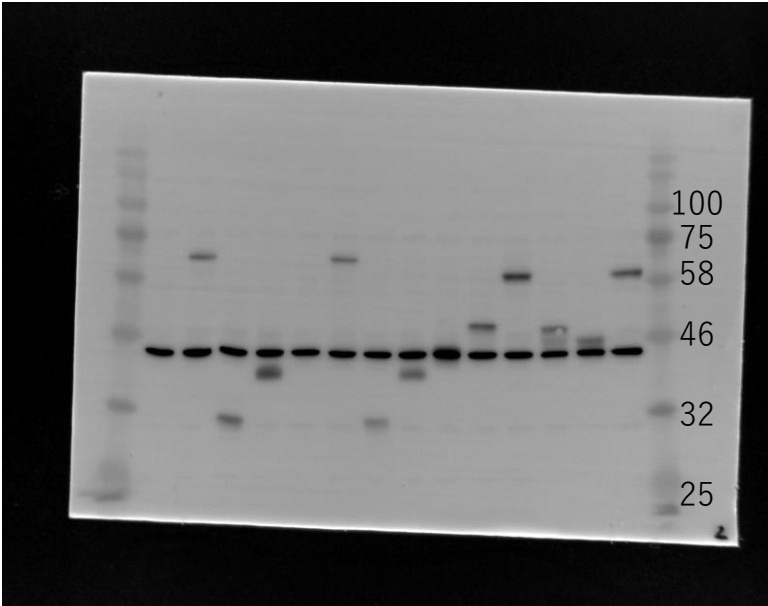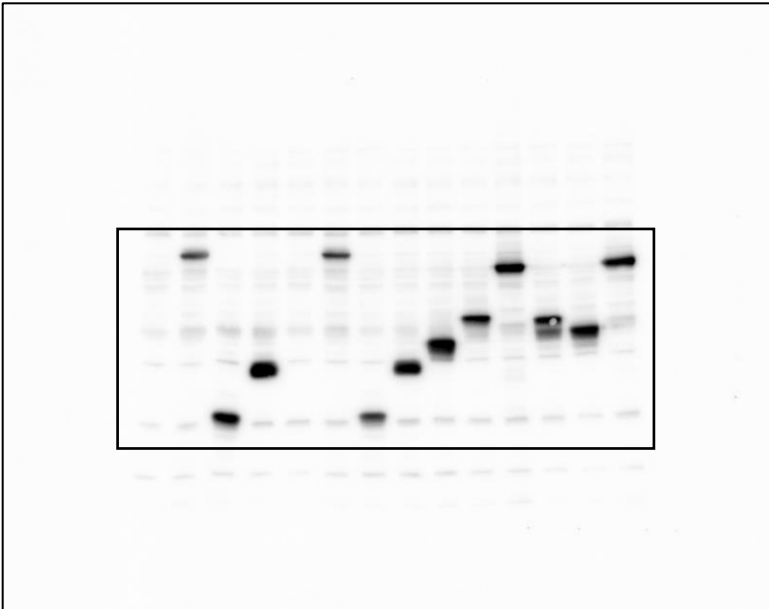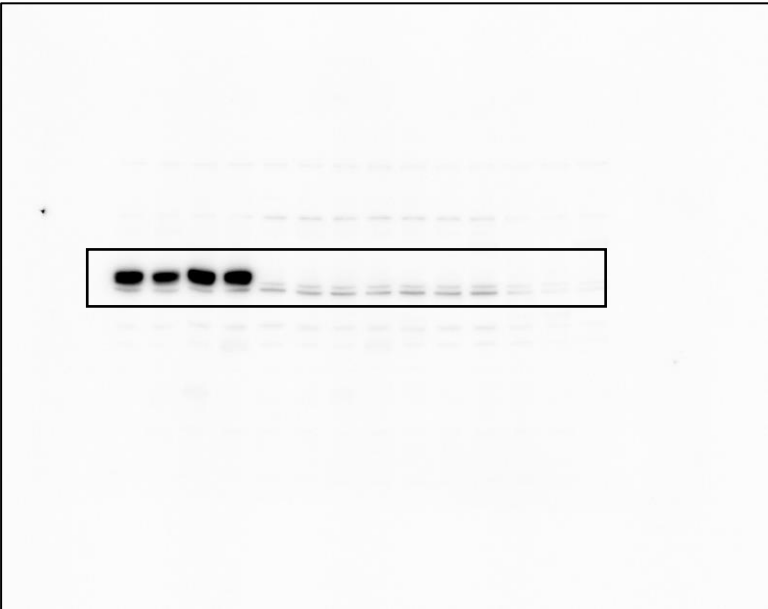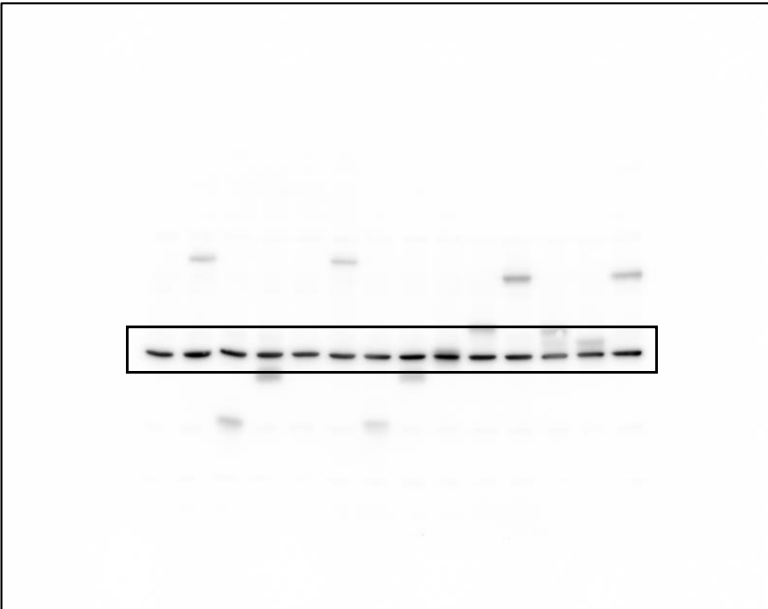

**Fig. S2H**

Flag

Myc

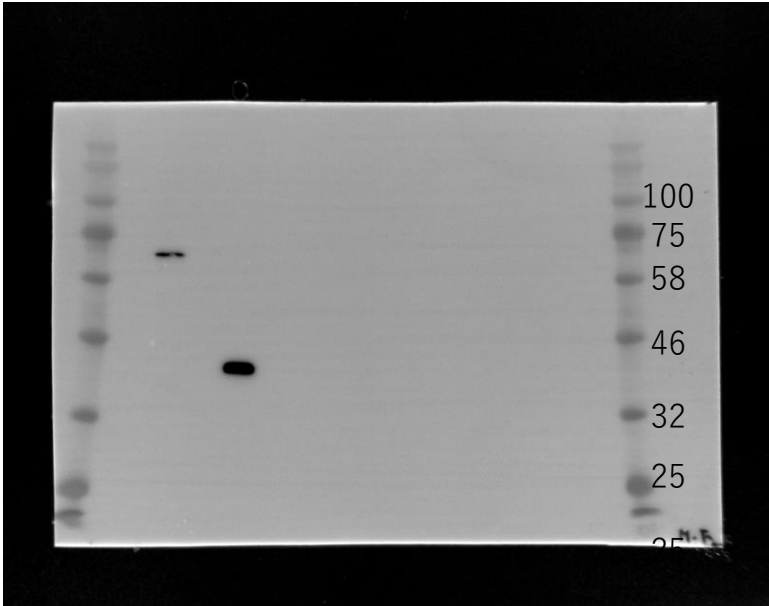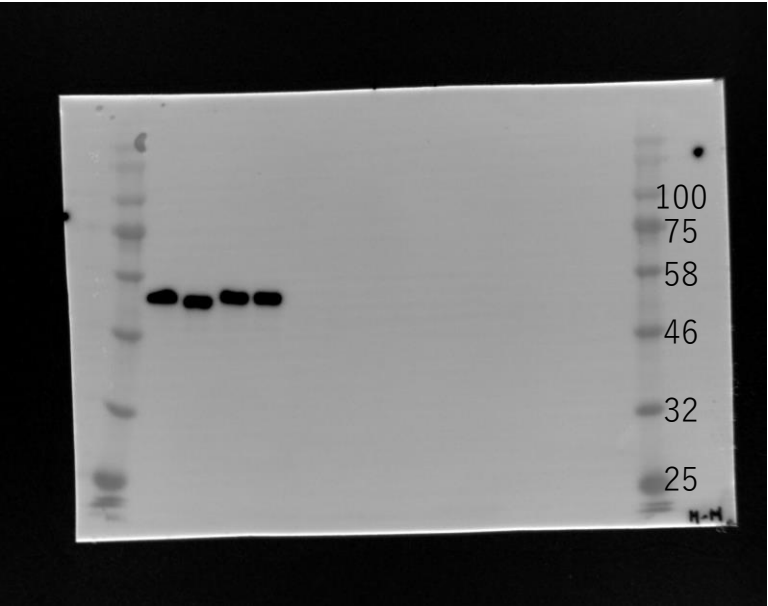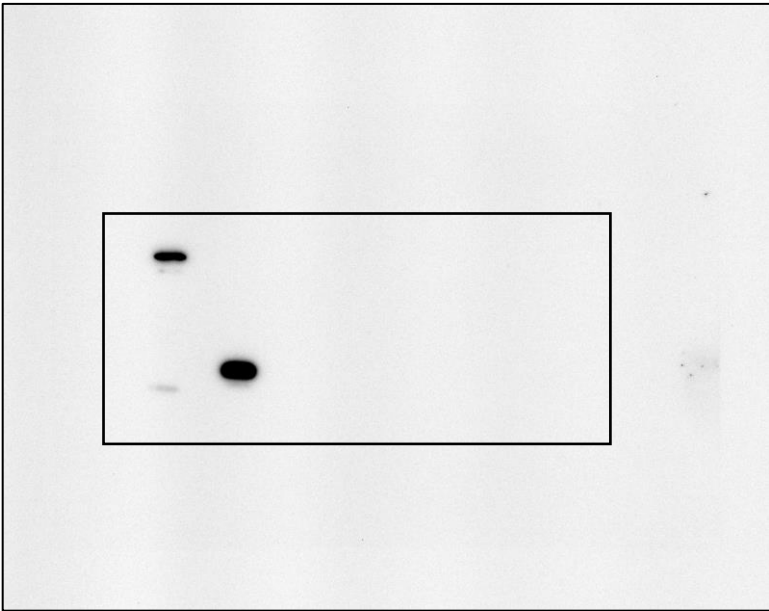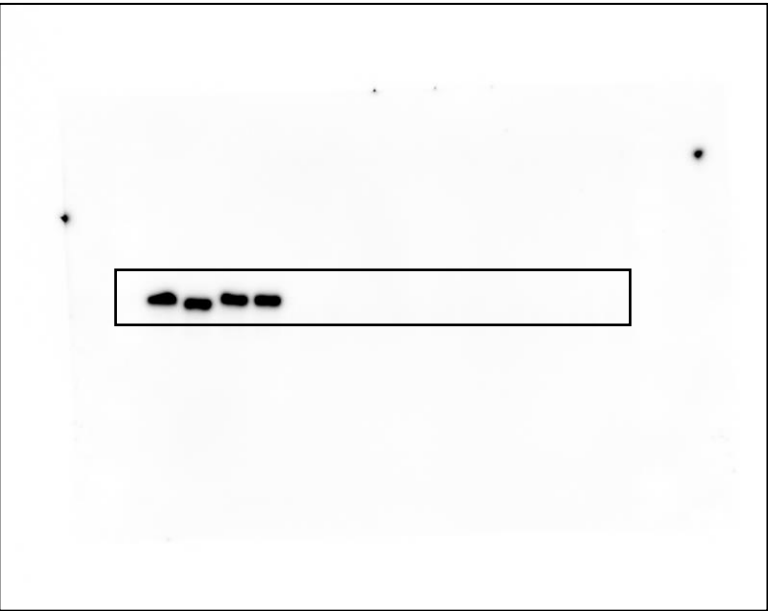

**Fig. S2I**

Flag

Myc

$\beta$ -actin

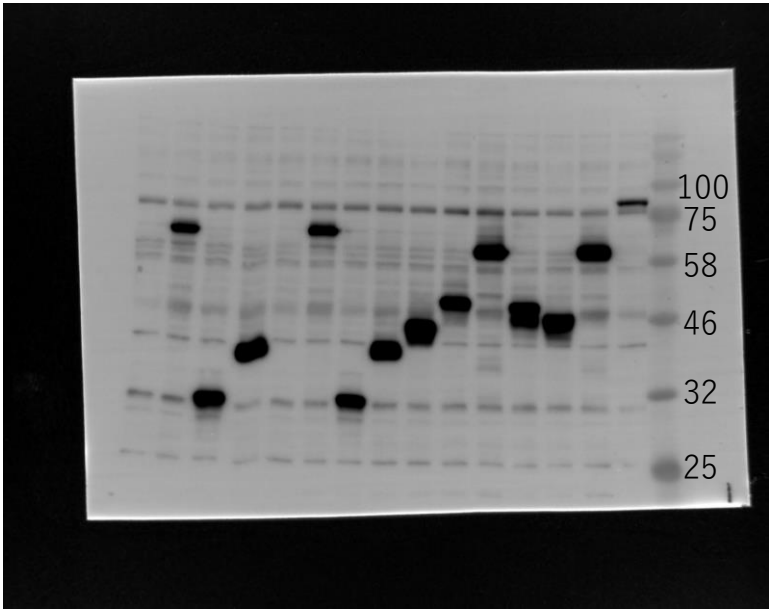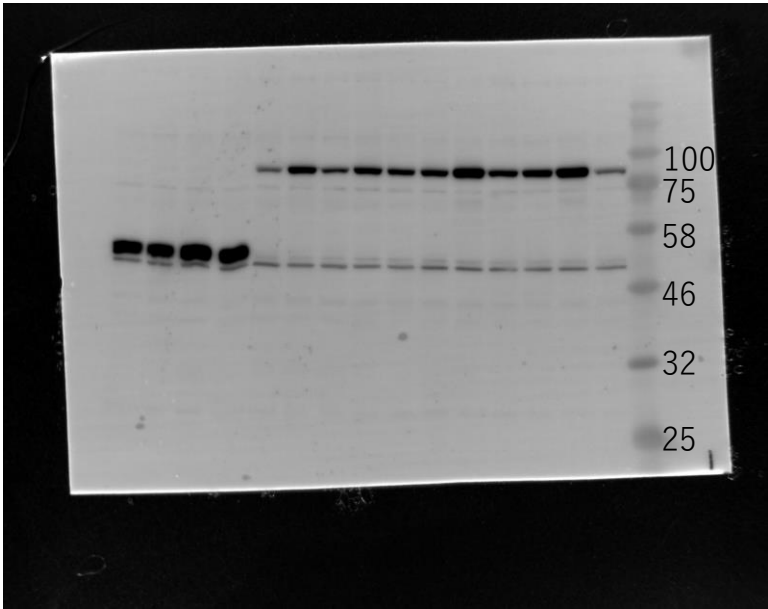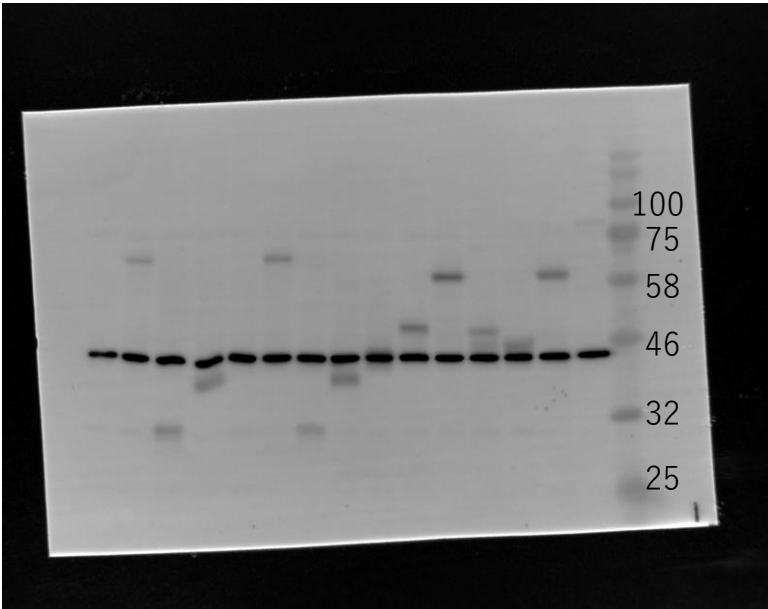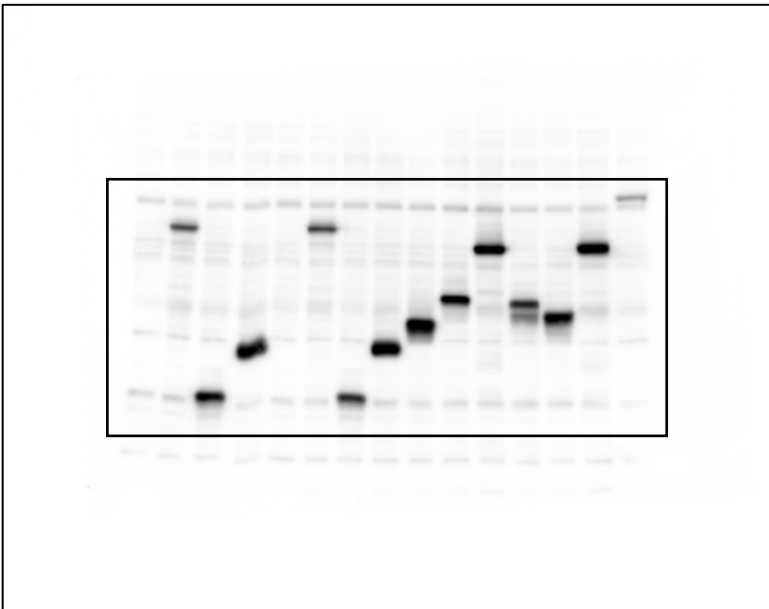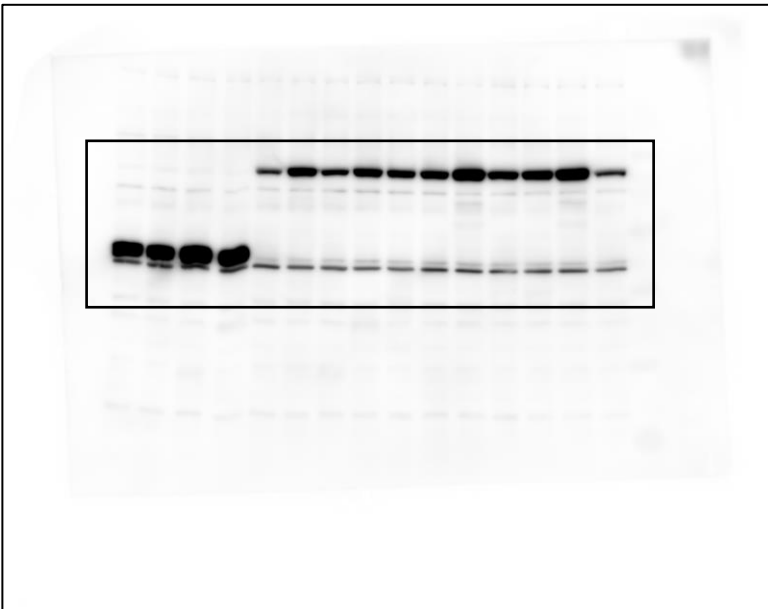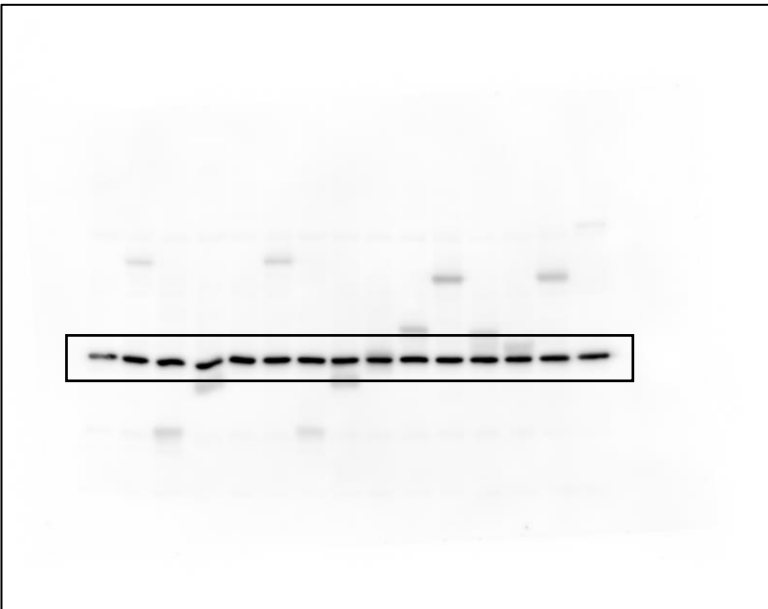

**Fig. S2J**

Flag

Myc

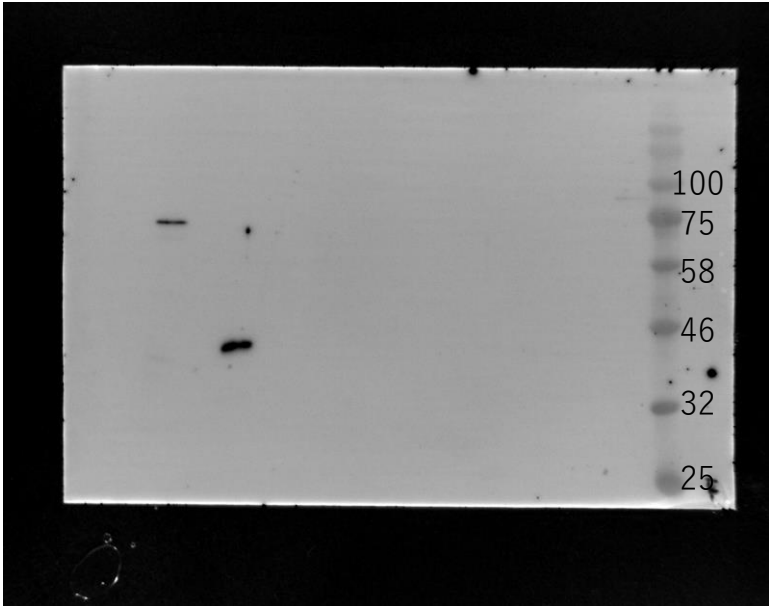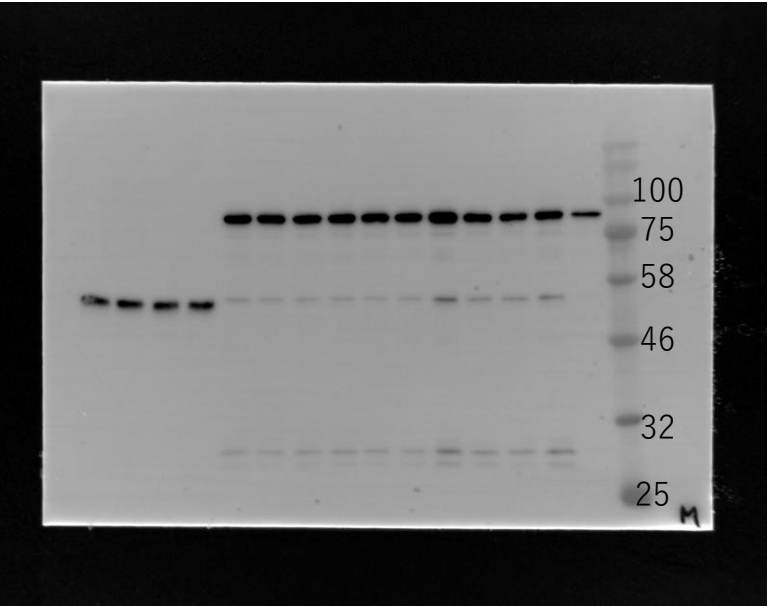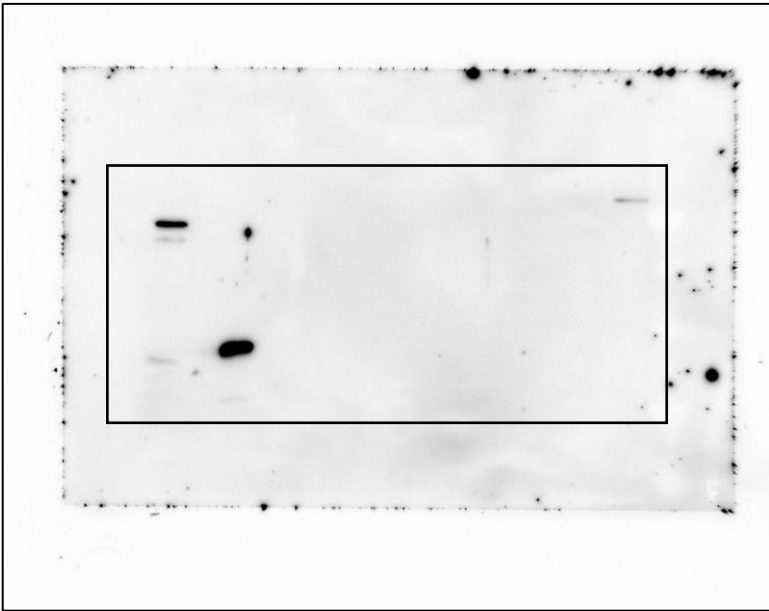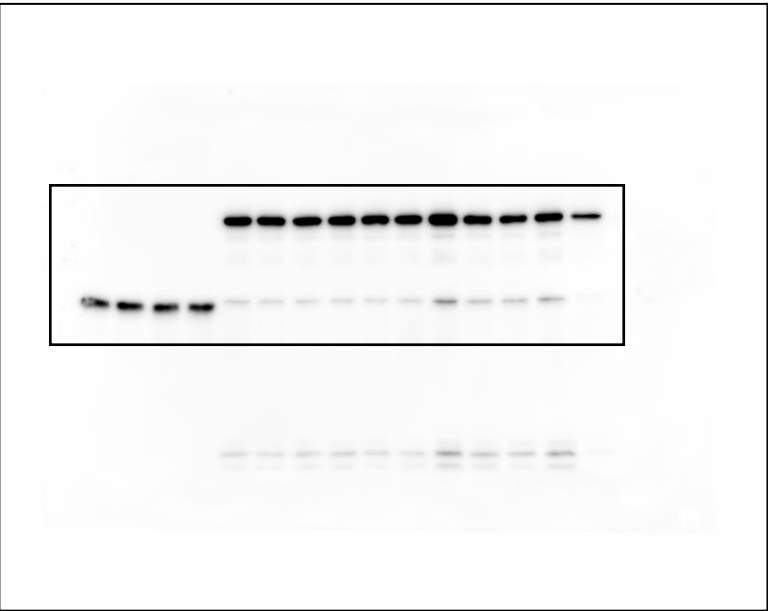



**Fig. S2K**

Flag

Myc

$\beta$ -actin

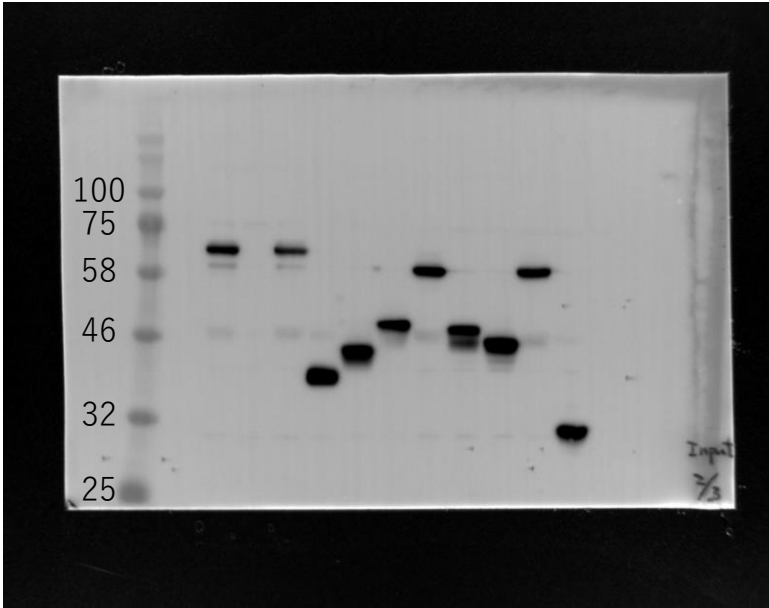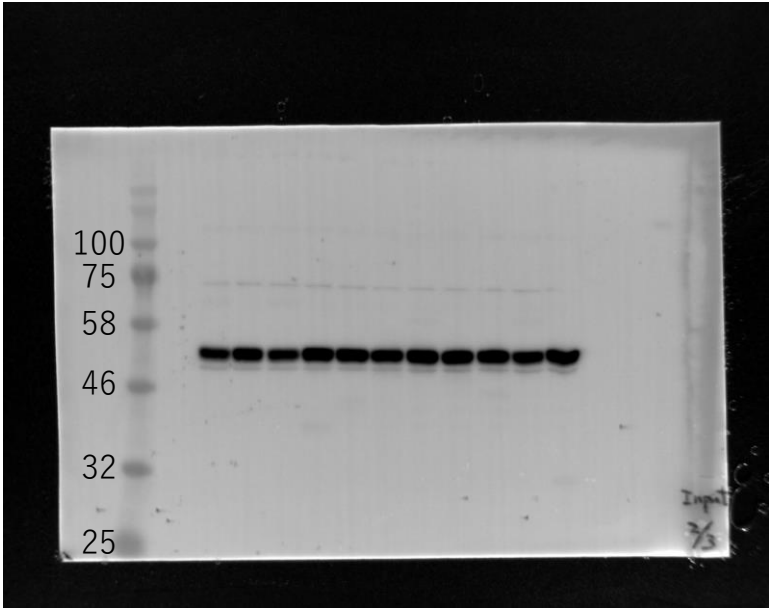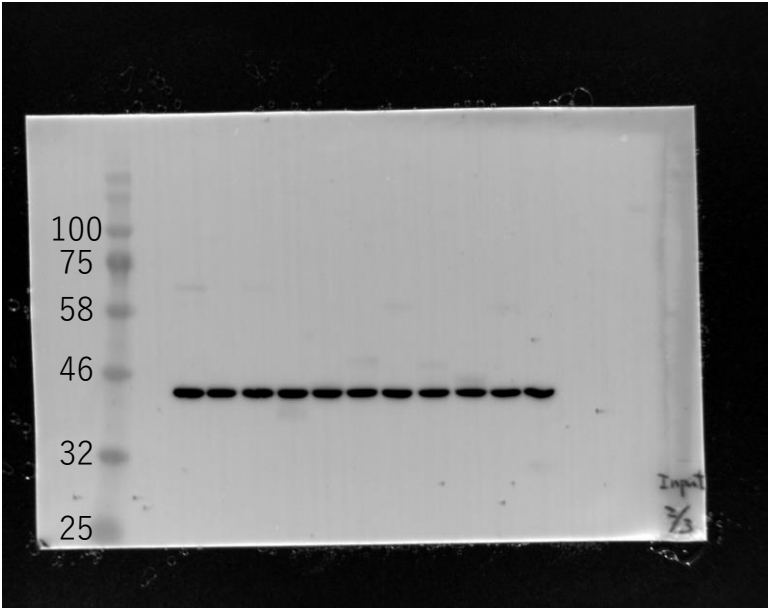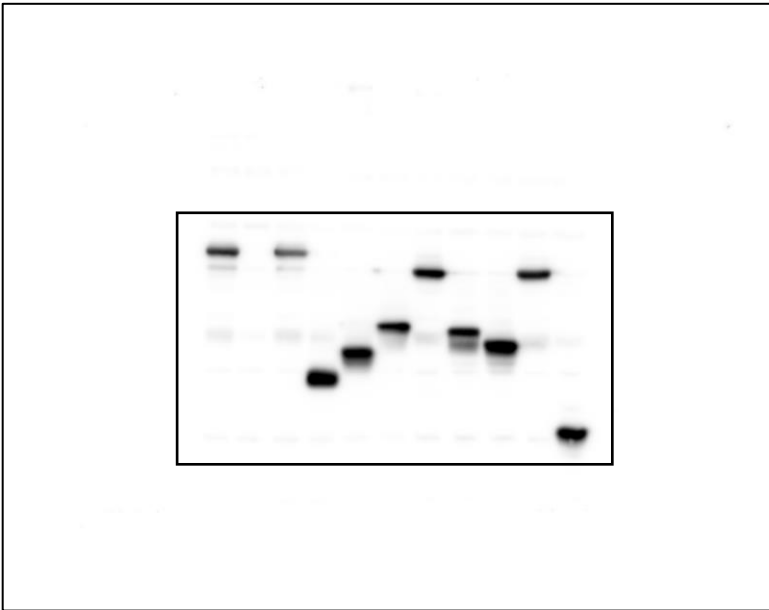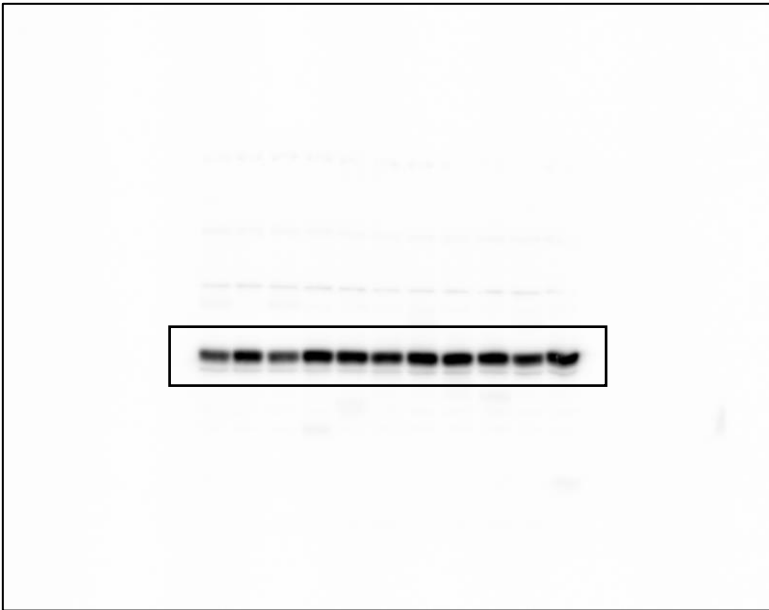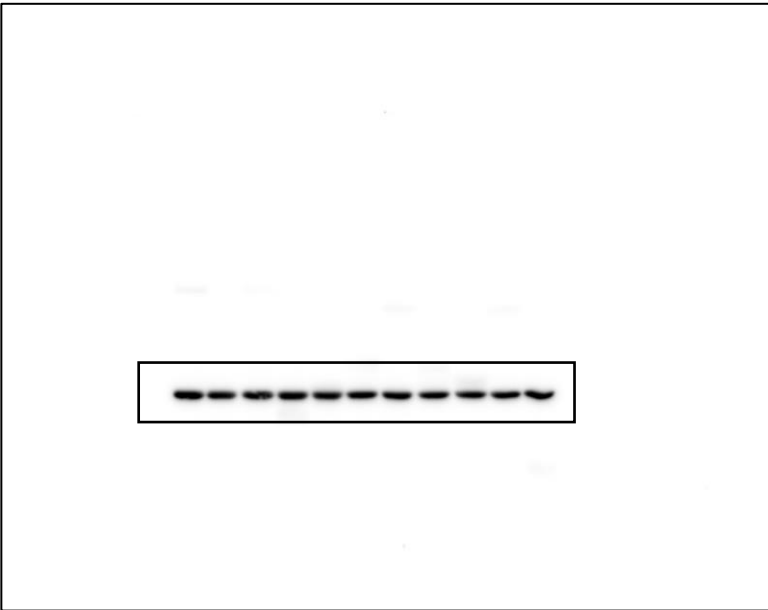

**Fig. S2L**

Flag

Myc

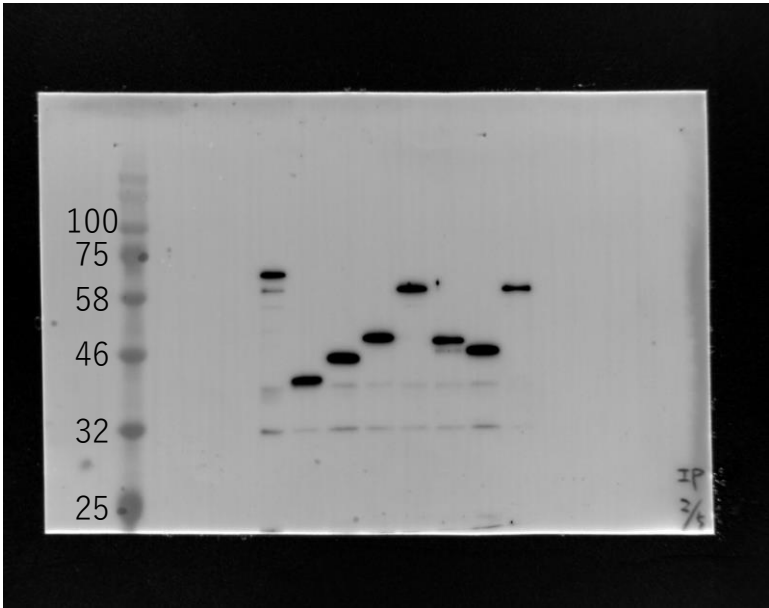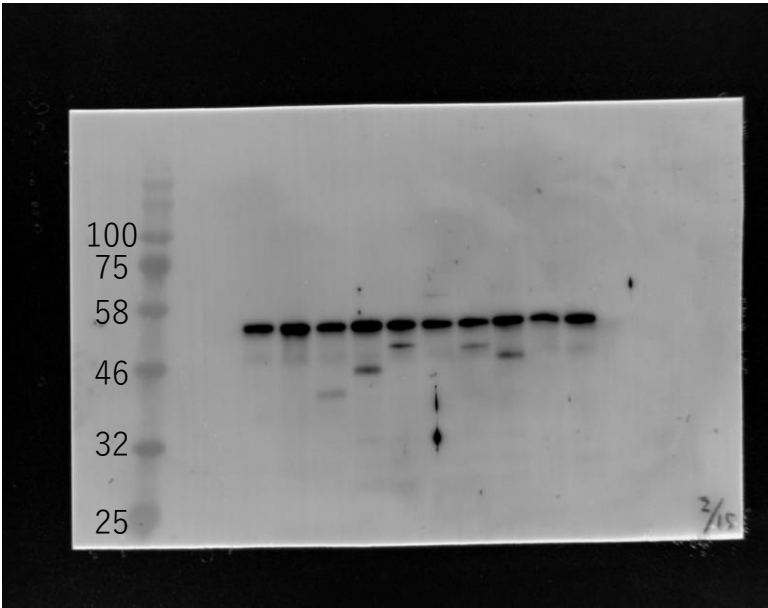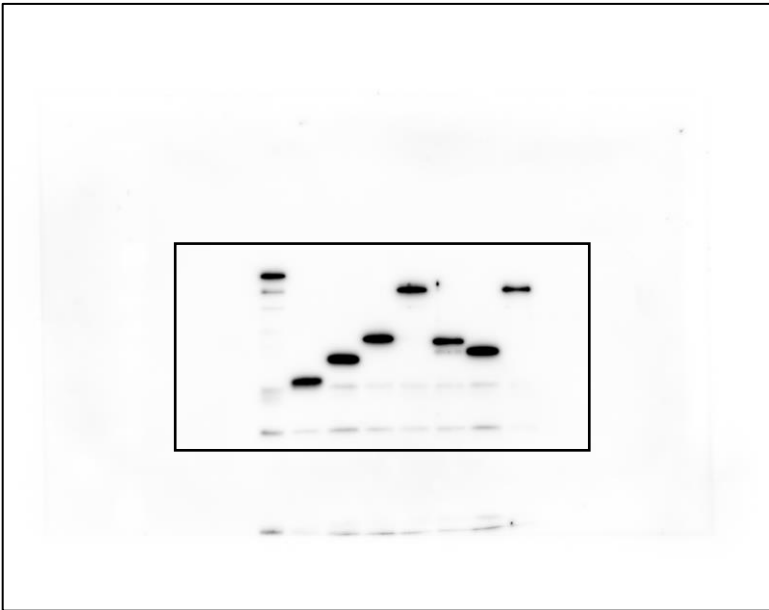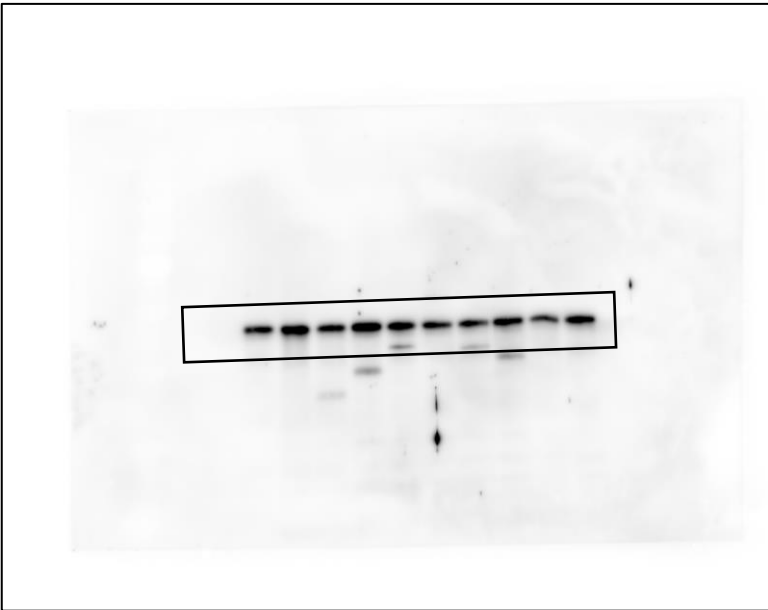

Supplement: JEM_20212276_SourceDataFS2.pdf [file JEM_20212276_SourceDataFS2.pdf]
