# Supplementary figures and images for: Human RELA dominant-negative mutations underlie type I interferonopathy with autoinflammation and autoimmunity
Source: PubMed Central journal article supplement — J Exp Med. 2023 Jun 5;220(9):e20212276. doi: 10.1084/jem.20212276 (PMC10242411; doi:10.1084/jem.20212276), 2023-06-05

Figure S1E,F

RELA

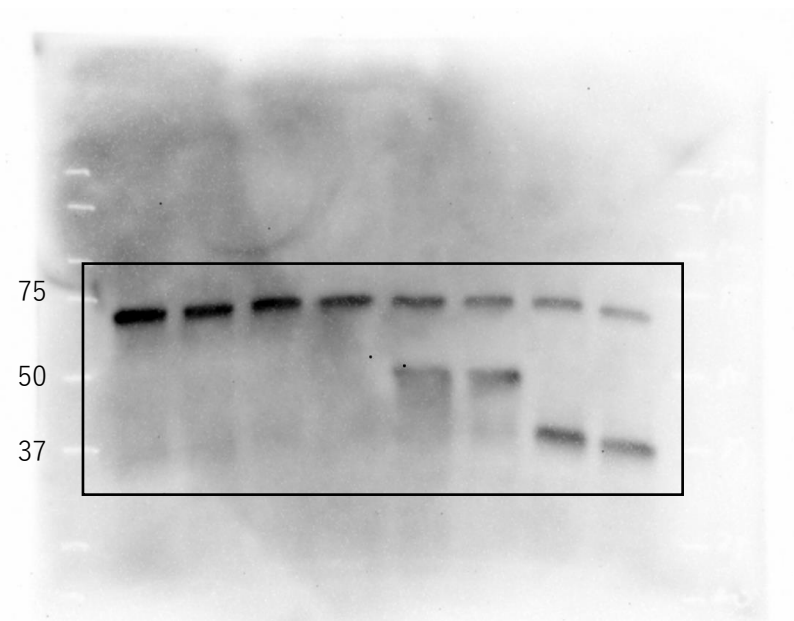

Lamin A/C

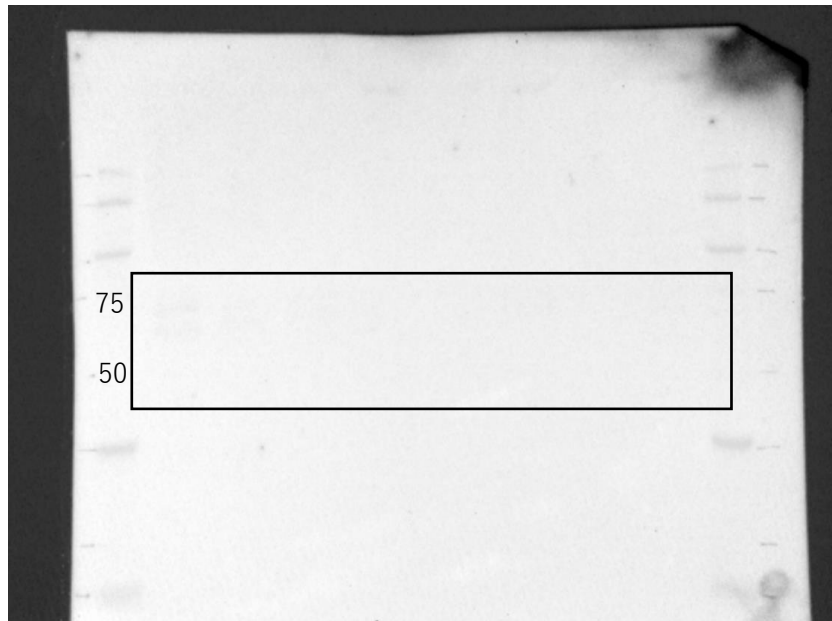

$\alpha$  Tubulin

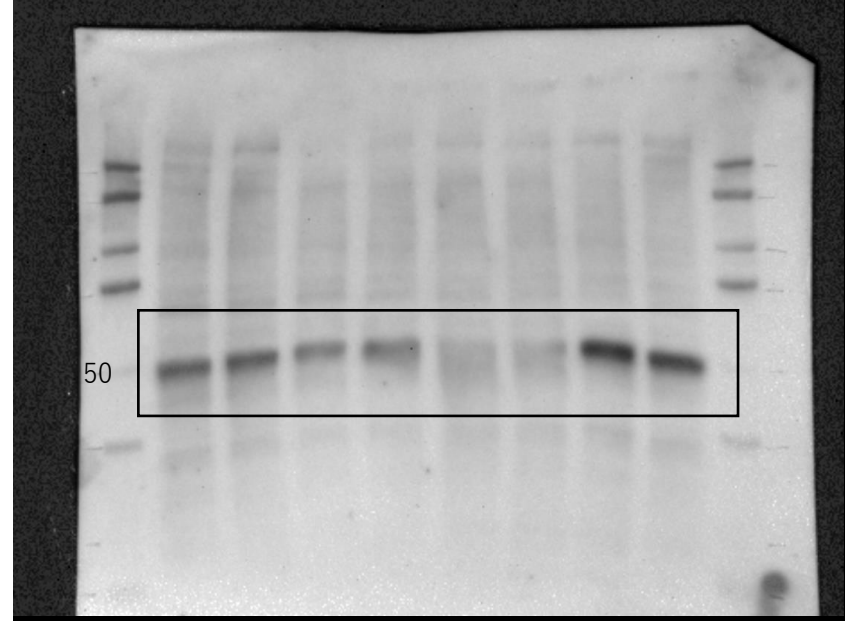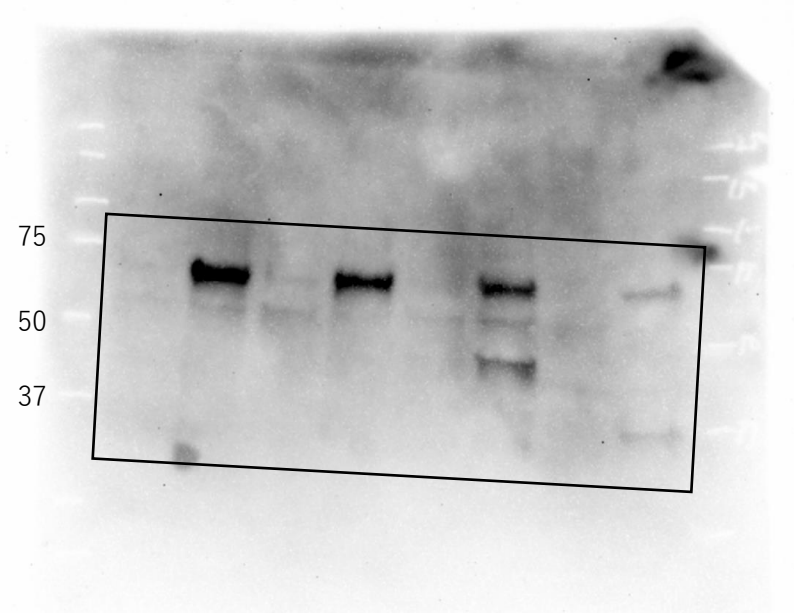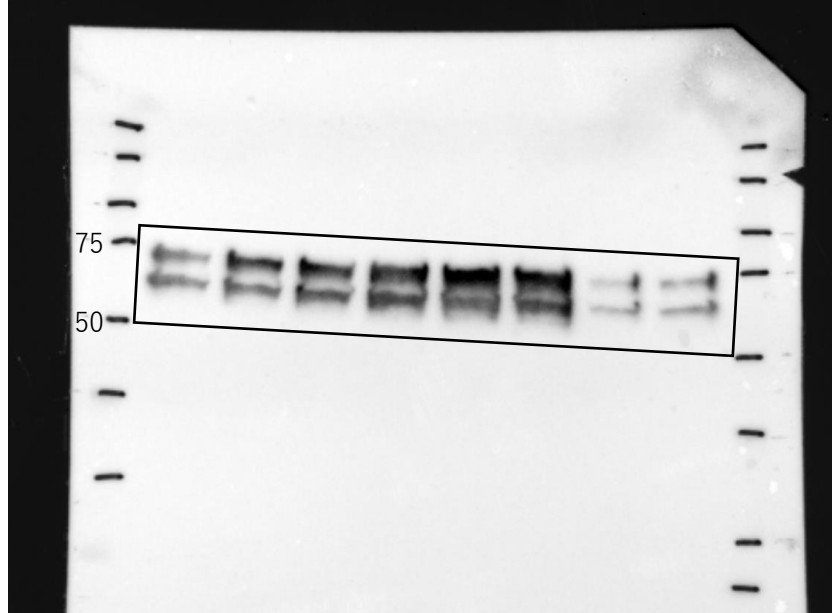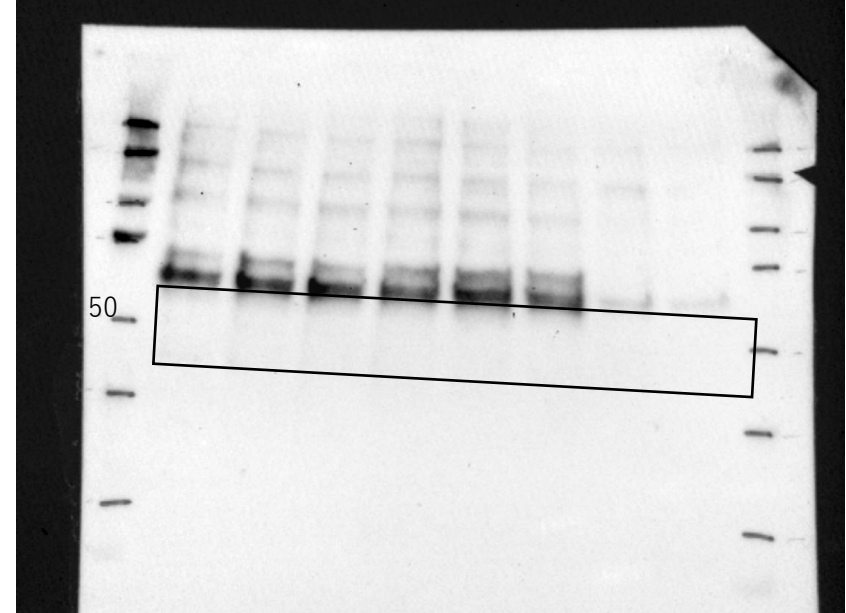

Supplement: JEM_20212276_SourceDataFS1.pdf [file JEM_20212276_SourceDataFS1.pdf]
